# Supplementary material for: A selective effect of dopamine on information-seeking
Source: eLife. 2020 Dec 2;9:e59152. doi: 10.7554/eLife.59152 (PMC7725498; doi:10.7554/eLife.59152)
Supplement: Figure 2—source data 1. [file elife-59152-fig2-data1.xlsx]

## Sheet: Sheet1
Subject	Group (0:placebo 1:L-Dopa)	Number_YES	Nr_No_trials	Nr_zero_trials	Nr_missed
1	0	6	19	175	0
2	0	11	1	186	2
3	0	113	6	80	1
4	0	12	184	2	2
5	0	150	41	9	0
6	0	14	7	176	3
7	0	2	15	182	1
8	0	9	9	179	3
9	0	22	117	60	1
10	0	27	1	161	11
11	0	1	3	154	42
12	0	40	18	140	2
13	0	13	12	171	4
14	0	89	104	3	4
15	0	64	121	12	3
16	0	113	48	35	4
17	0	153	32	10	5
18	0	68	4	128	0
19	0	103	55	41	1
20	0	84	24	90	2
21	0	162	7	29	2
22	0	23	2	167	8
23	0	141	37	13	9
24	0	122	1	38	39
25	0	79	115	5	1
26	0	71	5	110	14
27	0	35	9	150	6
28	0	52	5	138	5
29	0	27	9	161	3
30	0	45	65	86	4
32	0	46	24	118	12
33	0	13	27	155	5
34	0	90	103	4	3
35	1	110	39	45	6
36	1	99	17	78	6
37	1	130	31	36	3
38	1	114	14	54	18
39	1	124	40	22	14
40	1	30	19	85	66
41	1	42	11	143	4
42	1	124	58	3	15
43	1	75	11	112	2
44	1	17	11	160	12
45	1	138	10	51	1
46	1	22	0	143	35
47	1	20	1	176	3
48	1	71	48	78	3
49	1	175	14	6	5
50	1	160	3	35	2
51	1	18	19	161	2
53	1	15	180	0	5
54	1	46	3	150	1
55	1	116	7	68	9
56	1	5	18	171	6
57	1	3	16	178	3
58	1	3	13	170	14
59	1	60	12	123	5
60	1	23	3	171	3
61	1	56	2	137	5
62	1	152	32	12	4
63	1	96	40	60	4
64	1	24	6	165	5
65	1	20	11	167	2
66	1	26	7	167	0
67	0	22	34	142	2
68	1	49	45	102	4
69	1	12	27	156	5
70	1	38	13	149	0
71	1	0	5	193	2
72	1	31	34	135	0
73	1	35	22	139	4
74	1	94	16	90	0
75	1	79	23	93	5
76	1	139	58	1	2
77	0	173	13	13	1
78	0	160	5	35	0
79	1	150	6	42	2
80	1	8	6	185	1
81	0	9	17	173	1
82	0	68	77	20	17
83	1	168	11	19	2
84	0	157	28	14	1
85	1	191	0	8	1
86	0	2	5	193	0
87	1	87	12	98	3
88	0	90	47	63	0
89	1	131	44	18	7
90	0	170	9	14	7
91	1	66	33	101	0
92	0	76	20	99	5
93	1	52	17	131	0
94	0	104	10	74	12
95	0	9	5	174	12
96	1	184	3	13	0
97	0	15	22	156	7
98	0	177	8	14	1
99	1	92	44	64	0
100	0	104	30	60	6
101	1	196	0	3	1
102	0	76	0	116	8
103	1	40	48	109	3
104	0	98	64	32	6
105	1	40	40	119	1
106	1	73	9	116	2
107	0	59	32	108	1
108	1	11	3	166	20
109	0	177	6	15	2
110	1	60	12	121	7
111	0	57	49	94	0
112	1	197	2	0	1
113	0	143	16	3	38
114	0	34	50	104	12
115	1	104	65	30	1
116	0	193	0	4	3
117	0	131	11	54	4
118	0	121	32	40	7
119	0	11	1	185	3
120	1	56	19	124	1
121	0	104	82	12	2
122	0	86	62	51	1
123	0	69	43	87	1
124	0	196	4	0	0
125	1	136	26	34	4
126	1	61	7	126	6
127	1	29	38	131	2
128	1	7	7	175	11
129	1	45	2	133	20
130	1	176	2	6	16
131	1	197	2	0	1
132	1	146	9	45	0
133	1	75	33	92	0
134	1	87	112	0	1
135	1	1	4	188	7
136	1	22	13	162	3
137	1	59	87	48	6
138	1	121	15	64	0
139	1	18	42	138	2
140	1	68	8	123	1
141	1	138	54	6	2
142	1	159	24	10	7
143	1	23	13	150	14
144	1	116	35	46	3
145	1	90	21	89	0
146	1	39	59	102	0
147	1	8	84	102	6
148	1	60	3	130	7
149	1	127	69	2	2
150	1	179	17	3	1
151	1	28	7	164	1
152	1	186	14	0	0
153	1	76	25	54	45
154	1	33	5	158	4
155	1	41	17	141	1
156	1	13	177	5	5
157	1	159	7	28	6
158	1	103	12	85	0
159	1	35	7	151	7
160	1	26	10	162	2
161	1	127	7	66	0
162	1	29	13	154	4
163	1	13	31	156	0
164	1	25	40	135	0
165	1	44	16	136	4
166	1	74	20	4	102
167	1	69	57	69	5
168	1	14	23	163	0
169	1	23	3	166	8
170	1	50	58	89	3
171	1	13	26	159	2
172	1	77	7	115	1
173	1	22	175	1	2
174	1	85	1	105	9
175	1	11	9	178	2
176	1	4	9	123	64
177	1	46	25	124	5
178	1	152	42	4	2
179	1	0	200	0	0
180	1	88	35	68	9
181	1	105	67	27	1
182	0	32	17	148	3
183	0	173	15	2	10
184	0	3	9	170	18
185	0	194	1	0	5
186	0	51	32	117	0
187	0	149	11	38	2
188	0	5	4	187	4
189	0	102	2	0	96
190	0	23	5	169	3
191	0	72	12	109	7
193	0	32	41	127	0
194	0	199	0	0	1
195	0	30	8	161	1
196	0	8	0	160	32
197	0	68	23	109	0
198	0	44	17	112	27
199	0	2	3	193	2
200	0	51	28	120	1
201	0	13	39	129	19
202	0	97	14	87	2
203	0	12	13	174	1
204	0	14	5	177	4
205	0	9	15	163	13
206	0	69	121	10	0
207	0	83	41	74	2
208	0	20	2	178	0
209	0	81	30	87	2
210	0	101	8	91	0
211	0	11	12	167	10
212	0	23	14	162	1
213	0	7	1	164	28
214	0	20	45	134	1
215	0	134	3	53	10
216	0	5	4	189	2
217	0	5	12	182	1
218	0	2	9	85	104
219	0	12	6	177	5
220	0	118	5	76	1
221	0	2	198	0	0
222	0	3	4	193	0
223	0	125	22	50	3
224	0	162	28	8	2
225	0	54	18	127	1
226	0	193	2	0	5
227	0	92	17	86	5
228	0	75	78	47	0
229	0	191	2	6	1
230	0	21	5	170	4
231	0	9	26	159	6
233	0	118	35	45	2
234	0	162	31	7	0
235	0	79	100	20	1
236	0	4	19	172	5
