# Supplementary material for: A selective effect of dopamine on information-seeking
Source: eLife. 2020 Dec 2;9:e59152. doi: 10.7554/eLife.59152 (PMC7725498; doi:10.7554/eLife.59152)
Supplement: Figure 3—source data 1. [file elife-59152-fig3-data1.xlsx]

## Sheet: All_WTP_choice
Subj	Trial	vWTP	MarketChange	AbsMarketChange	Val_1up	group_0placebo
1	1	0	0.066161	0.066161	1	0
1	2	-1	-5.02119	5.02119	0	0
1	3	0	0.824128	0.824128	1	0
1	4	0	3.73273	3.73273	1	0
1	5	0	-0.725034	0.725034	0	0
1	6	-1	1.40586	1.40586	1	0
1	7	0	-10.3069	10.3069	0	0
1	8	0	3.00816	3.00816	1	0
1	9	0	3.64969	3.64969	1	0
1	10	0	6.56966	6.56966	1	0
1	11	0	7.05608	7.05608	1	0
1	12	0	4.03489	4.03489	1	0
1	13	0	-10.0916	10.0916	0	0
1	14	0	-3.09029	3.09029	0	0
1	15	0	-13.5484	13.5484	0	0
1	16	0	-2.82903	2.82903	0	0
1	17	0	-0.0252126	0.0252126	0	0
1	18	0	3.20537	3.20537	1	0
1	19	0	7.1633	7.1633	1	0
1	20	0	4.11156	4.11156	1	0
1	21	0	3.10321	3.10321	1	0
1	22	-1	4.28374	4.28374	1	0
1	23	0	-0.771276	0.771276	0	0
1	24	0	4.26291	4.26291	1	0
1	25	-1	-8.68569	8.68569	0	0
1	26	-1	-3.20198	3.20198	0	0
1	27	0	2.61918	2.61918	1	0
1	28	0	2.84957	2.84957	1	0
1	29	0	-3.14649	3.14649	0	0
1	30	0	4.13018	4.13018	1	0
1	31	0	-1.93366	1.93366	0	0
1	32	0	4.44542	4.44542	1	0
1	33	0	-2.90937	2.90937	0	0
1	34	0	2.14804	2.14804	1	0
1	35	1	-2.11586	2.11586	0	0
1	36	0	3.6928	3.6928	1	0
1	37	0	0.0759618	0.0759618	1	0
1	38	0	8.40231	8.40231	1	0
1	39	0	-1.52387	1.52387	0	0
1	40	0	1.95024	1.95024	1	0
1	41	1	-2.94754	2.94754	0	0
1	42	0	1.91227	1.91227	1	0
1	43	-1	-7.01962	7.01962	0	0
1	44	0	4.26722	4.26722	1	0
1	45	0	-5.90742	5.90742	0	0
1	46	0	-2.33356	2.33356	0	0
1	47	0	7.59669	7.59669	1	0
1	48	0	2.96743	2.96743	1	0
1	49	0	-9.57733	9.57733	0	0
1	50	0	-0.788381	0.788381	0	0
1	51	0	0.812163	0.812163	1	0
1	52	-1	-5.79804	5.79804	0	0
1	53	0	-0.66843	0.66843	0	0
1	54	0	0.247622	0.247622	1	0
1	55	-1	-4.35005	4.35005	0	0
1	56	0	-2.14507	2.14507	0	0
1	57	0	-0.801738	0.801738	0	0
1	58	0	1.91928	1.91928	1	0
1	59	0	3.828	3.828	1	0
1	60	0	-5.91795	5.91795	0	0
1	61	0	-3.46576	3.46576	0	0
1	62	0	1.97973	1.97973	1	0
1	63	-1	10.4626	10.4626	1	0
1	64	0	-3.16666	3.16666	0	0
1	65	0	0.509153	0.509153	1	0
1	66	0	9.45783	9.45783	1	0
1	67	0	-11.1017	11.1017	0	0
1	68	0	-1.79753	1.79753	0	0
1	69	0	5.04082	5.04082	1	0
1	70	0	12.8073	12.8073	1	0
1	71	0	5.1145	5.1145	1	0
1	72	0	4.19197	4.19197	1	0
1	73	0	0.570261	0.570261	1	0
1	74	0	-2.89377	2.89377	0	0
1	75	0	-6.8167	6.8167	0	0
1	76	0	-0.281706	0.281706	0	0
1	77	0	6.50011	6.50011	1	0
1	78	0	-6.47218	6.47218	0	0
1	79	0	-7.98968	7.98968	0	0
1	80	0	-1.87874	1.87874	0	0
1	81	0	4.19735	4.19735	1	0
1	82	0	0.455118	0.455118	1	0
1	83	0	-11.9047	11.9047	0	0
1	84	-2	-6.22533	6.22533	0	0
1	85	1	1.70019	1.70019	1	0
1	86	0	3.36975	3.36975	1	0
1	87	0	3.80893	3.80893	1	0
1	88	0	-4.43743	4.43743	0	0
1	89	0	5.18026	5.18026	1	0
1	90	0	7.90151	7.90151	1	0
1	91	0	6.58907	6.58907	1	0
1	92	0	5.39358	5.39358	1	0
1	93	0	2.19289	2.19289	1	0
1	94	0	1.83575	1.83575	1	0
1	95	0	-4.87278	4.87278	0	0
1	96	0	-4.10687	4.10687	0	0
1	97	0	-3.83854	3.83854	0	0
1	98	0	-2.11106	2.11106	0	0
1	99	-1	6.44164	6.44164	1	0
1	100	-1	-0.242784	0.242784	0	0
1	101	0	5.02632	5.02632	1	0
1	102	0	0.855002	0.855002	1	0
1	103	0	-5.11695	5.11695	0	0
1	104	0	7.47754	7.47754	1	0
1	105	0	5.48572	5.48572	1	0
1	106	-1	-3.98182	3.98182	0	0
1	107	0	4.06853	4.06853	1	0
1	108	0	-1.36489	1.36489	0	0
1	109	0	-0.205823	0.205823	0	0
1	110	0	2.04418	2.04418	1	0
1	111	0	-4.57946	4.57946	0	0
1	112	0	7.61035	7.61035	1	0
1	113	0	-2.52438	2.52438	0	0
1	114	0	1.6106	1.6106	1	0
1	115	0	-5.25404	5.25404	0	0
1	116	0	-9.79306	9.79306	0	0
1	117	0	-3.46183	3.46183	0	0
1	118	0	5.21456	5.21456	1	0
1	119	0	14.5603	14.5603	1	0
1	120	0	-6.83467	6.83467	0	0
1	121	0	-10.6961	10.6961	0	0
1	122	0	-11.2249	11.2249	0	0
1	123	0	-2.71587	2.71587	0	0
1	124	-1	1.35445	1.35445	1	0
1	125	0	-0.157744	0.157744	0	0
1	126	0	7.09431	7.09431	1	0
1	127	0	-1.99702	1.99702	0	0
1	128	-1	1.64669	1.64669	1	0
1	129	0	-0.597886	0.597886	0	0
1	130	0	-4.54544	4.54544	0	0
1	131	0	4.56328	4.56328	1	0
1	132	0	1.99639	1.99639	1	0
1	133	0	0.348429	0.348429	1	0
1	134	0	5.95098	5.95098	1	0
1	135	0	2.02752	2.02752	1	0
1	136	0	1.79113	1.79113	1	0
1	137	-1	-9.45515	9.45515	0	0
1	138	0	2.21528	2.21528	1	0
1	139	0	7.7127	7.7127	1	0
1	140	0	-2.93027	2.93027	0	0
1	141	0	2.31902	2.31902	1	0
1	142	-1	-6.30736	6.30736	0	0
1	143	0	4.7822	4.7822	1	0
1	144	0	4.21556	4.21556	1	0
1	145	0	-4.63687	4.63687	0	0
1	146	0	1.54	1.54	1	0
1	147	0	-0.112385	0.112385	0	0
1	148	0	0.985078	0.985078	1	0
1	149	0	0.822995	0.822995	1	0
1	150	1	-2.25491	2.25491	0	0
1	151	0	2.3181	2.3181	1	0
1	152	0	1.37752	1.37752	1	0
1	153	0	8.10499	8.10499	1	0
1	154	0	-7.41896	7.41896	0	0
1	155	0	-7.42999	7.42999	0	0
1	156	0	-4.5746	4.5746	0	0
1	157	0	5.14557	5.14557	1	0
1	158	-1	-1.85782	1.85782	0	0
1	159	0	5.55343	5.55343	1	0
1	160	0	-2.69184	2.69184	0	0
1	161	0	4.75016	4.75016	1	0
1	162	0	-6.58702	6.58702	0	0
1	163	0	0.00874053	0.00874053	1	0
1	164	0	-0.0059016	0.0059016	0	0
1	165	0	5.83072	5.83072	1	0
1	166	0	1.67271	1.67271	1	0
1	167	0	-4.62414	4.62414	0	0
1	168	0	1.10501	1.10501	1	0
1	169	0	6.39627	6.39627	1	0
1	170	0	-4.58804	4.58804	0	0
1	171	0	3.58947	3.58947	1	0
1	172	0	2.01872	2.01872	1	0
1	173	0	-0.411057	0.411057	0	0
1	174	0	5.51803	5.51803	1	0
1	175	0	-5.55329	5.55329	0	0
1	176	0	-7.83873	7.83873	0	0
1	177	0	-6.17028	6.17028	0	0
1	178	0	-1.1689	1.1689	0	0
1	179	0	-2.04074	2.04074	0	0
1	180	0	-4.8152	4.8152	0	0
1	181	0	3.62236	3.62236	1	0
1	182	-1	4.2583	4.2583	1	0
1	183	0	-0.600139	0.600139	0	0
1	184	0	-3.67779	3.67779	0	0
1	185	1	3.94988	3.94988	1	0
1	186	1	-3.04526	3.04526	0	0
1	187	0	-1.26116	1.26116	0	0
1	188	0	-2.42079	2.42079	0	0
1	189	0	-2.88602	2.88602	0	0
1	190	0	2.84256	2.84256	1	0
1	191	0	-2.28954	2.28954	0	0
1	192	0	4.59797	4.59797	1	0
1	193	0	-4.05564	4.05564	0	0
1	194	0	-1.25221	1.25221	0	0
1	195	0	1.00348	1.00348	1	0
1	196	0	5.56999	5.56999	1	0
1	197	0	5.32048	5.32048	1	0
1	198	0	1.83135	1.83135	1	0
1	199	0	-0.445629	0.445629	0	0
1	200	0	1.91273	1.91273	1	0
2	1	0	-1.60916	1.60916	0	0
2	2	-50	-3.56775	3.56775	0	0
2	3	0	-8.05317	8.05317	0	0
2	4	1	-3.99321	3.99321	0	0
2	5	0	4.30691	4.30691	1	0
2	6	0	4.72571	4.72571	1	0
2	7	0	0.25354	0.25354	1	0
2	9	0	5.02645	5.02645	1	0
2	10	0	-3.15882	3.15882	0	0
2	11	0	-5.47661	5.47661	0	0
2	12	0	9.31863	9.31863	1	0
2	13	0	-7.32172	7.32172	0	0
2	14	0	0.240905	0.240905	1	0
2	15	0	6.54302	6.54302	1	0
2	16	0	-5.18802	5.18802	0	0
2	17	99	11.6378	11.6378	1	0
2	18	0	-5.31574	5.31574	0	0
2	19	0	6.9987	6.9987	1	0
2	20	0	5.94393	5.94393	1	0
2	21	0	-2.00248	2.00248	0	0
2	22	0	2.72632	2.72632	1	0
2	23	0	-7.08757	7.08757	0	0
2	24	0	-2.88237	2.88237	0	0
2	25	0	6.10647	6.10647	1	0
2	26	0	11.9058	11.9058	1	0
2	27	0	1.73755	1.73755	1	0
2	28	0	-5.63282	5.63282	0	0
2	29	0	-8.55046	8.55046	0	0
2	30	0	4.12385	4.12385	1	0
2	31	0	6.43871	6.43871	1	0
2	33	0	-2.92669	2.92669	0	0
2	34	0	-9.98257	9.98257	0	0
2	35	0	9.05755	9.05755	1	0
2	36	0	-0.786591	0.786591	0	0
2	37	0	1.35809	1.35809	1	0
2	38	0	-4.13919	4.13919	0	0
2	39	0	-1.67476	1.67476	0	0
2	40	0	-4.61585	4.61585	0	0
2	41	0	1.5717	1.5717	1	0
2	42	0	-12.443	12.443	0	0
2	43	0	0.595146	0.595146	1	0
2	44	1	2.75649	2.75649	1	0
2	45	0	-4.06887	4.06887	0	0
2	46	0	-5.21457	5.21457	0	0
2	47	0	2.5715	2.5715	1	0
2	48	1	-3.77269	3.77269	0	0
2	49	0	1.01285	1.01285	1	0
2	50	0	-0.00771246	0.00771246	0	0
2	51	1	-4.08036	4.08036	0	0
2	52	0	5.54736	5.54736	1	0
2	53	0	5.65487	5.65487	1	0
2	54	0	4.06854	4.06854	1	0
2	55	0	-7.9112	7.9112	0	0
2	56	0	4.02335	4.02335	1	0
2	57	0	-9.43665	9.43665	0	0
2	58	0	3.90573	3.90573	1	0
2	59	0	-4.81108	4.81108	0	0
2	60	0	5.11219	5.11219	1	0
2	61	0	10.2833	10.2833	1	0
2	62	0	2.42997	2.42997	1	0
2	63	0	1.95736	1.95736	1	0
2	64	0	-13.9233	13.9233	0	0
2	65	0	-6.89454	6.89454	0	0
2	66	0	3.35871	3.35871	1	0
2	67	0	-2.89235	2.89235	0	0
2	68	0	6.91858	6.91858	1	0
2	69	0	11.2577	11.2577	1	0
2	70	0	-6.94357	6.94357	0	0
2	71	0	0.836827	0.836827	1	0
2	72	0	0.809994	0.809994	1	0
2	73	0	1.14591	1.14591	1	0
2	74	0	-2.38122	2.38122	0	0
2	75	0	5.0226	5.0226	1	0
2	76	0	-3.21789	3.21789	0	0
2	77	1	-4.51716	4.51716	0	0
2	78	0	-0.59108	0.59108	0	0
2	79	0	0.141524	0.141524	1	0
2	80	0	-5.02269	5.02269	0	0
2	81	0	1.76247	1.76247	1	0
2	82	0	6.66752	6.66752	1	0
2	83	0	0.78973	0.78973	1	0
2	84	0	1.33513	1.33513	1	0
2	85	0	0.747815	0.747815	1	0
2	86	0	-1.13791	1.13791	0	0
2	87	0	-9.75744	9.75744	0	0
2	88	0	2.40811	2.40811	1	0
2	89	0	1.31741	1.31741	1	0
2	90	0	2.14073	2.14073	1	0
2	91	0	6.76813	6.76813	1	0
2	92	0	1.58635	1.58635	1	0
2	93	0	2.19314	2.19314	1	0
2	94	0	-7.46009	7.46009	0	0
2	95	0	-0.107998	0.107998	0	0
2	96	0	-8.17126	8.17126	0	0
2	97	0	4.32913	4.32913	1	0
2	98	0	-0.694343	0.694343	0	0
2	99	0	-2.32748	2.32748	0	0
2	100	0	3.71374	3.71374	1	0
2	101	0	3.76916	3.76916	1	0
2	102	0	0.932992	0.932992	1	0
2	103	0	-1.49869	1.49869	0	0
2	104	0	2.19873	2.19873	1	0
2	105	0	10.6463	10.6463	1	0
2	106	3	-15.9293	15.9293	0	0
2	107	0	-0.227243	0.227243	0	0
2	108	1	17.0603	17.0603	1	0
2	109	0	-3.06284	3.06284	0	0
2	110	0	-6.93728	6.93728	0	0
2	111	0	4.35281	4.35281	1	0
2	112	0	3.84976	3.84976	1	0
2	113	0	-4.17026	4.17026	0	0
2	114	0	4.98675	4.98675	1	0
2	115	0	-0.33014	0.33014	0	0
2	116	0	-4.09848	4.09848	0	0
2	117	0	1.73374	1.73374	1	0
2	118	0	1.0579	1.0579	1	0
2	119	0	-6.46381	6.46381	0	0
2	120	0	-1.60589	1.60589	0	0
2	121	0	3.33475	3.33475	1	0
2	122	0	-2.20565	2.20565	0	0
2	123	0	0.990468	0.990468	1	0
2	124	0	0.377327	0.377327	1	0
2	125	0	-5.07562	5.07562	0	0
2	126	0	-11.8228	11.8228	0	0
2	127	0	10.377	10.377	1	0
2	128	0	-1.37001	1.37001	0	0
2	129	0	4.76976	4.76976	1	0
2	130	0	-0.838654	0.838654	0	0
2	131	1	-3.93877	3.93877	0	0
2	132	0	1.12025	1.12025	1	0
2	133	0	5.49113	5.49113	1	0
2	134	0	-2.44675	2.44675	0	0
2	135	0	-2.16239	2.16239	0	0
2	136	0	-8.7497	8.7497	0	0
2	137	0	-6.51585	6.51585	0	0
2	138	0	-2.49477	2.49477	0	0
2	139	0	2.08021	2.08021	1	0
2	140	0	10.3765	10.3765	1	0
2	141	0	-0.905596	0.905596	0	0
2	142	0	0.189233	0.189233	1	0
2	143	0	-5.04998	5.04998	0	0
2	144	0	-0.848109	0.848109	0	0
2	145	0	2.30645	2.30645	1	0
2	146	0	-9.37544	9.37544	0	0
2	147	0	11.7054	11.7054	1	0
2	148	0	-10.9506	10.9506	0	0
2	149	0	1.87357	1.87357	1	0
2	150	0	-2.84606	2.84606	0	0
2	151	0	-0.851935	0.851935	0	0
2	152	0	4.31941	4.31941	1	0
2	153	0	6.65148	6.65148	1	0
2	154	0	3.04997	3.04997	1	0
2	155	0	-0.67252	0.67252	0	0
2	156	0	-8.06302	8.06302	0	0
2	157	0	-2.84335	2.84335	0	0
2	158	0	4.64548	4.64548	1	0
2	159	0	3.03444	3.03444	1	0
2	160	0	-6.51836	6.51836	0	0
2	161	0	2.47283	2.47283	1	0
2	162	0	-4.52284	4.52284	0	0
2	163	0	5.20581	5.20581	1	0
2	164	0	-4.89732	4.89732	0	0
2	165	0	1.77596	1.77596	1	0
2	166	0	-1.89092	1.89092	0	0
2	167	0	9.44067	9.44067	1	0
2	168	0	1.3129	1.3129	1	0
2	169	0	0.348889	0.348889	1	0
2	170	0	-4.56059	4.56059	0	0
2	171	0	-0.701633	0.701633	0	0
2	172	0	-1.63383	1.63383	0	0
2	173	0	-0.977083	0.977083	0	0
2	174	0	0.717775	0.717775	1	0
2	175	0	-4.86989	4.86989	0	0
2	176	0	-1.19536	1.19536	0	0
2	177	0	-2.55313	2.55313	0	0
2	178	0	-0.314755	0.314755	0	0
2	179	0	5.68991	5.68991	1	0
2	180	0	1.75582	1.75582	1	0
2	181	0	1.88995	1.88995	1	0
2	182	1	8.55816	8.55816	1	0
2	183	0	-3.58041	3.58041	0	0
2	184	0	2.22	2.22	1	0
2	185	0	-12.7993	12.7993	0	0
2	186	0	-4.53378	4.53378	0	0
2	187	0	1.87639	1.87639	1	0
2	188	0	-1.71154	1.71154	0	0
2	189	1	4.98721	4.98721	1	0
2	190	0	-0.87173	0.87173	0	0
2	191	0	-4.40553	4.40553	0	0
2	192	0	-3.47939	3.47939	0	0
2	193	0	4.42024	4.42024	1	0
2	194	0	-0.625156	0.625156	0	0
2	195	0	10.8412	10.8412	1	0
2	196	0	8.39685	8.39685	1	0
2	197	0	-0.283234	0.283234	0	0
2	198	0	-2.77529	2.77529	0	0
2	199	0	-0.20938	0.20938	0	0
2	200	0	6.45011	6.45011	1	0
3	1	26	4.57919	4.57919	1	0
3	2	48	1.57483	1.57483	1	0
3	3	0	-5.00776	5.00776	0	0
3	4	0	-3.74375	3.74375	0	0
3	5	-2	-5.84274	5.84274	0	0
3	6	0	-2.7031	2.7031	0	0
3	7	1	-6.58397	6.58397	0	0
3	8	0	8.31007	8.31007	1	0
3	9	0	-0.63617	0.63617	0	0
3	10	3	9.02388	9.02388	1	0
3	12	1	-3.70919	3.70919	0	0
3	13	1	-8.50532	8.50532	0	0
3	14	0	5.76571	5.76571	1	0
3	15	2	3.87462	3.87462	1	0
3	16	1	7.64679	7.64679	1	0
3	17	0	-4.20922	4.20922	0	0
3	18	8	5.46753	5.46753	1	0
3	19	2	13.0465	13.0465	1	0
3	20	0	-5.49246	5.49246	0	0
3	21	1	-4.61708	4.61708	0	0
3	22	0	-5.49428	5.49428	0	0
3	23	1	-13.1296	13.1296	0	0
3	24	0	2.02931	2.02931	1	0
3	25	3	7.48027	7.48027	1	0
3	26	0	0.775251	0.775251	1	0
3	27	0	-1.51297	1.51297	0	0
3	28	4	2.94752	2.94752	1	0
3	29	0	8.95022	8.95022	1	0
3	30	1	-0.662941	0.662941	0	0
3	31	1	1.2235	1.2235	1	0
3	32	5	-0.276978	0.276978	0	0
3	33	8	-2.93575	2.93575	0	0
3	34	0	-4.15014	4.15014	0	0
3	35	0	-9.99954	9.99954	0	0
3	36	1	1.12103	1.12103	1	0
3	37	0	0.44605	0.44605	1	0
3	38	0	9.48251	9.48251	1	0
3	39	0	4.36491	4.36491	1	0
3	40	1	-0.598307	0.598307	0	0
3	41	2	1.06511	1.06511	1	0
3	42	1	-8.64345	8.64345	0	0
3	43	0	-16.0789	16.0789	0	0
3	44	2	10.9036	10.9036	1	0
3	45	0	0.0619136	0.0619136	1	0
3	46	1	-2.33653	2.33653	0	0
3	47	0	3.47892	3.47892	1	0
3	48	2	2.15482	2.15482	1	0
3	49	2	1.38114	1.38114	1	0
3	50	1	8.27929	8.27929	1	0
3	51	0	9.63981	9.63981	1	0
3	52	0	-6.17354	6.17354	0	0
3	53	1	-8.02349	8.02349	0	0
3	54	2	-4.85566	4.85566	0	0
3	55	2	-4.99281	4.99281	0	0
3	56	-1	5.60991	5.60991	1	0
3	57	-15	1.72903	1.72903	1	0
3	58	1	2.29447	2.29447	1	0
3	59	0	6.54749	6.54749	1	0
3	60	0	2.51721	2.51721	1	0
3	61	0	4.53802	4.53802	1	0
3	62	0	4.03906	4.03906	1	0
3	63	0	-5.62491	5.62491	0	0
3	64	4	-3.51891	3.51891	0	0
3	65	2	-3.0853	3.0853	0	0
3	66	0	5.57028	5.57028	1	0
3	67	1	5.77088	5.77088	1	0
3	68	0	0.559397	0.559397	1	0
3	69	0	0.0817622	0.0817622	1	0
3	70	5	-3.24126	3.24126	0	0
3	71	2	-14.3042	14.3042	0	0
3	72	0	4.27752	4.27752	1	0
3	73	0	-5.75502	5.75502	0	0
3	74	5	5.40563	5.40563	1	0
3	75	3	-1.63624	1.63624	0	0
3	76	3	1.49185	1.49185	1	0
3	77	0	-4.81157	4.81157	0	0
3	78	5	3.14469	3.14469	1	0
3	79	0	-2.44112	2.44112	0	0
3	80	0	2.69565	2.69565	1	0
3	81	0	-3.00628	3.00628	0	0
3	82	0	12.5325	12.5325	1	0
3	83	0	2.58354	2.58354	1	0
3	84	2	5.16136	5.16136	1	0
3	85	1	-10.07	10.07	0	0
3	86	2	-14.9668	14.9668	0	0
3	87	0	5.84774	5.84774	1	0
3	88	1	6.54305	6.54305	1	0
3	89	0	-6.3266	6.3266	0	0
3	90	1	5.50054	5.50054	1	0
3	91	0	5.68916	5.68916	1	0
3	92	-2	-4.01554	4.01554	0	0
3	93	0	5.89609	5.89609	1	0
3	94	0	4.21239	4.21239	1	0
3	95	1	1.20757	1.20757	1	0
3	96	2	0.770205	0.770205	1	0
3	97	1	-3.658	3.658	0	0
3	98	6	-1.14484	1.14484	0	0
3	99	2	-5.14026	5.14026	0	0
3	100	1	-1.10105	1.10105	0	0
3	101	1	8.43925	8.43925	1	0
3	102	0	0.674029	0.674029	1	0
3	103	2	1.09465	1.09465	1	0
3	104	5	3.76788	3.76788	1	0
3	105	2	-5.83399	5.83399	0	0
3	106	0	-0.964066	0.964066	0	0
3	107	21	-12.8214	12.8214	0	0
3	108	1	0.3718	0.3718	1	0
3	109	0	-8.85664	8.85664	0	0
3	110	3	-3.60508	3.60508	0	0
3	111	2	7.3291	7.3291	1	0
3	112	1	1.99032	1.99032	1	0
3	113	1	-0.87564	0.87564	0	0
3	114	-1	-5.58405	5.58405	0	0
3	115	0	-2.9729	2.9729	0	0
3	116	0	2.44353	2.44353	1	0
3	117	2	-1.13212	1.13212	0	0
3	118	5	8.6815	8.6815	1	0
3	119	2	-2.78971	2.78971	0	0
3	120	1	1.9552	1.9552	1	0
3	121	0	3.51516	3.51516	1	0
3	122	2	-0.664723	0.664723	0	0
3	123	4	-3.41089	3.41089	0	0
3	124	0	-3.65297	3.65297	0	0
3	125	6	-3.81642	3.81642	0	0
3	126	1	3.89229	3.89229	1	0
3	127	3	0.32535	0.32535	1	0
3	128	4	-3.78865	3.78865	0	0
3	129	2	0.553833	0.553833	1	0
3	130	1	3.31763	3.31763	1	0
3	131	1	1.87576	1.87576	1	0
3	132	2	10.8177	10.8177	1	0
3	133	0	-2.84673	2.84673	0	0
3	134	0	7.31685	7.31685	1	0
3	135	0	6.30776	6.30776	1	0
3	136	8	-2.34729	2.34729	0	0
3	137	2	4.4223	4.4223	1	0
3	138	0	-9.83075	9.83075	0	0
3	139	0	-2.27478	2.27478	0	0
3	140	0	-2.24982	2.24982	0	0
3	141	0	-4.35833	4.35833	0	0
3	142	1	7.99351	7.99351	1	0
3	143	0	7.06713	7.06713	1	0
3	144	0	1.43025	1.43025	1	0
3	145	2	-2.22414	2.22414	0	0
3	146	3	-3.37827	3.37827	0	0
3	147	0	-6.15852	6.15852	0	0
3	148	2	4.32296	4.32296	1	0
3	149	0	6.35574	6.35574	1	0
3	150	2	-4.16873	4.16873	0	0
3	151	0	-1.23405	1.23405	0	0
3	152	4	-1.83274	1.83274	0	0
3	153	1	-3.98098	3.98098	0	0
3	154	4	3.82501	3.82501	1	0
3	155	2	4.97386	4.97386	1	0
3	156	1	-2.92451	2.92451	0	0
3	157	13	-13.8432	13.8432	0	0
3	158	6	0.46427	0.46427	1	0
3	159	3	7.936	7.936	1	0
3	160	0	0.696111	0.696111	1	0
3	161	2	3.6089	3.6089	1	0
3	162	0	2.80289	2.80289	1	0
3	163	6	-4.25182	4.25182	0	0
3	164	0	-5.84751	5.84751	0	0
3	165	1	0.390369	0.390369	1	0
3	166	2	-3.91358	3.91358	0	0
3	167	4	10.0848	10.0848	1	0
3	168	2	0.555011	0.555011	1	0
3	169	0	11.8847	11.8847	1	0
3	170	6	0.427474	0.427474	1	0
3	171	0	4.82325	4.82325	1	0
3	172	0	1.39465	1.39465	1	0
3	173	3	-4.41922	4.41922	0	0
3	174	8	-3.27918	3.27918	0	0
3	175	1	-2.63036	2.63036	0	0
3	176	2	-1.20144	1.20144	0	0
3	177	3	3.53197	3.53197	1	0
3	178	6	-3.08445	3.08445	0	0
3	179	2	-2.89496	2.89496	0	0
3	180	3	7.81402	7.81402	1	0
3	181	4	-4.78912	4.78912	0	0
3	182	1	-4.97878	4.97878	0	0
3	183	0	0.181797	0.181797	1	0
3	184	0	-3.82447	3.82447	0	0
3	185	1	-0.329417	0.329417	0	0
3	186	2	-7.10636	7.10636	0	0
3	187	0	-6.29167	6.29167	0	0
3	188	0	3.06233	3.06233	1	0
3	189	0	8.39676	8.39676	1	0
3	190	1	-4.01487	4.01487	0	0
3	191	0	-4.09167	4.09167	0	0
3	192	0	2.43853	2.43853	1	0
3	193	2	-1.43389	1.43389	0	0
3	194	2	7.02495	7.02495	1	0
3	195	0	-2.07413	2.07413	0	0
3	196	0	-5.31015	5.31015	0	0
3	197	-6	-0.928541	0.928541	0	0
3	198	0	6.16141	6.16141	1	0
3	199	0	3.70962	3.70962	1	0
3	200	2	1.64739	1.64739	1	0
4	1	6	-8.51288	8.51288	0	0
4	2	-7	0.792239	0.792239	1	0
4	3	-10	3.84414	3.84414	1	0
4	4	7	3.96741	3.96741	1	0
4	5	21	12.8762	12.8762	1	0
4	6	9	-5.34796	5.34796	0	0
4	7	-12	1.81889	1.81889	1	0
4	8	17	-9.63649	9.63649	0	0
4	9	0	-1.35408	1.35408	0	0
4	11	-21	6.04119	6.04119	1	0
4	12	-22	2.58157	2.58157	1	0
4	13	-5	-0.20626	0.20626	0	0
4	14	-8	-0.167987	0.167987	0	0
4	15	4	4.83843	4.83843	1	0
4	16	-51	7.14655	7.14655	1	0
4	17	-5	1.35991	1.35991	1	0
4	18	-8	4.10521	4.10521	1	0
4	19	-10	-4.77009	4.77009	0	0
4	20	-4	4.09673	4.09673	1	0
4	21	-7	-3.89223	3.89223	0	0
4	22	-26	-4.92946	4.92946	0	0
4	23	-13	3.50201	3.50201	1	0
4	24	-8	1.86767	1.86767	1	0
4	25	-10	-0.465467	0.465467	0	0
4	26	-4	3.29601	3.29601	1	0
4	27	-13	3.60268	3.60268	1	0
4	28	-15	-2.80958	2.80958	0	0
4	29	-7	-5.23022	5.23022	0	0
4	30	-20	1.06193	1.06193	1	0
4	31	7	8.13889	8.13889	1	0
4	32	-12	-1.21933	1.21933	0	0
4	34	-16	-11.576	11.576	0	0
4	35	-12	-2.15993	2.15993	0	0
4	36	-19	4.36498	4.36498	1	0
4	37	-8	1.14297	1.14297	1	0
4	38	-2	5.70273	5.70273	1	0
4	39	-7	-4.11025	4.11025	0	0
4	40	-5	1.15907	1.15907	1	0
4	41	-9	-4.4825	4.4825	0	0
4	42	-10	8.53589	8.53589	1	0
4	43	-8	-6.97065	6.97065	0	0
4	44	-8	8.371	8.371	1	0
4	45	-9	5.24802	5.24802	1	0
4	46	-8	-0.972764	0.972764	0	0
4	47	-5	-3.21211	3.21211	0	0
4	48	-4	-5.83221	5.83221	0	0
4	49	-6	1.0209	1.0209	1	0
4	50	-2	-0.752951	0.752951	0	0
4	51	-6	4.493	4.493	1	0
4	52	-3	-7.98169	7.98169	0	0
4	53	-8	-2.70075	2.70075	0	0
4	54	-13	4.12198	4.12198	1	0
4	55	-22	-8.27667	8.27667	0	0
4	56	-6	6.75779	6.75779	1	0
4	57	-3	4.00784	4.00784	1	0
4	58	-12	-12.5564	12.5564	0	0
4	59	-6	1.62964	1.62964	1	0
4	60	-10	7.93858	7.93858	1	0
4	61	-5	6.07344	6.07344	1	0
4	62	-8	-9.00385	9.00385	0	0
4	63	-9	3.37424	3.37424	1	0
4	64	-12	0.743137	0.743137	1	0
4	65	-6	-4.84033	4.84033	0	0
4	66	-8	8.23409	8.23409	1	0
4	67	-6	0.577394	0.577394	1	0
4	68	-15	5.02792	5.02792	1	0
4	69	-8	6.12072	6.12072	1	0
4	70	-6	0.966673	0.966673	1	0
4	71	-14	-0.67554	0.67554	0	0
4	72	-13	-4.12679	4.12679	0	0
4	73	-8	-1.56335	1.56335	0	0
4	74	10	-1.45454	1.45454	0	0
4	75	-7	-0.0370409	0.0370409	0	0
4	76	-10	0.837898	0.837898	1	0
4	77	-13	-6.1022	6.1022	0	0
4	78	-12	-0.681392	0.681392	0	0
4	79	-4	0.257462	0.257462	1	0
4	80	-15	3.05523	3.05523	1	0
4	81	-7	-8.09351	8.09351	0	0
4	82	-9	6.20378	6.20378	1	0
4	83	-8	-2.83706	2.83706	0	0
4	84	-10	0.0643402	0.0643402	1	0
4	85	-12	-5.51154	5.51154	0	0
4	86	-6	-10.4876	10.4876	0	0
4	87	-18	3.06608	3.06608	1	0
4	88	-9	0.779212	0.779212	1	0
4	89	-11	-5.24465	5.24465	0	0
4	90	9	6.43654	6.43654	1	0
4	91	-6	-3.67489	3.67489	0	0
4	92	-14	2.09713	2.09713	1	0
4	93	-21	1.83632	1.83632	1	0
4	94	-12	6.31552	6.31552	1	0
4	95	-11	1.64858	1.64858	1	0
4	96	-9	-2.09491	2.09491	0	0
4	97	-8	2.06773	2.06773	1	0
4	98	-15	0.217628	0.217628	1	0
4	99	-4	-1.26028	1.26028	0	0
4	100	0	2.84934	2.84934	1	0
4	101	-10	1.46178	1.46178	1	0
4	102	-8	-2.72607	2.72607	0	0
4	103	-10	5.99898	5.99898	1	0
4	104	-9	3.25166	3.25166	1	0
4	105	-5	-3.17211	3.17211	0	0
4	106	-11	3.4323	3.4323	1	0
4	107	-6	-3.93985	3.93985	0	0
4	108	-8	-11.2099	11.2099	0	0
4	109	-6	-7.05301	7.05301	0	0
4	110	-9	2.11346	2.11346	1	0
4	111	-8	0.369142	0.369142	1	0
4	112	-9	7.72568	7.72568	1	0
4	113	-6	0.606134	0.606134	1	0
4	114	-8	11.9427	11.9427	1	0
4	115	-4	4.4068	4.4068	1	0
4	116	-9	-0.848743	0.848743	0	0
4	117	-12	-10.6179	10.6179	0	0
4	118	-9	1.92817	1.92817	1	0
4	119	-12	3.5969	3.5969	1	0
4	120	11	-17.5813	17.5813	0	0
4	121	-14	-6.76279	6.76279	0	0
4	122	-8	1.87373	1.87373	1	0
4	123	-11	8.72293	8.72293	1	0
4	124	-12	-2.25218	2.25218	0	0
4	125	-10	1.00845	1.00845	1	0
4	126	-3	-3.31794	3.31794	0	0
4	127	-9	7.48078	7.48078	1	0
4	128	-9	-3.24513	3.24513	0	0
4	129	-7	-6.14909	6.14909	0	0
4	130	-7	5.13735	5.13735	1	0
4	131	-9	2.97337	2.97337	1	0
4	132	-8	-6.84087	6.84087	0	0
4	133	-6	7.80982	7.80982	1	0
4	134	-7	-0.987299	0.987299	0	0
4	135	-8	-7.30277	7.30277	0	0
4	136	-7	-1.39023	1.39023	0	0
4	137	-12	-2.16016	2.16016	0	0
4	138	-10	8.28077	8.28077	1	0
4	139	-9	-3.47459	3.47459	0	0
4	140	-8	1.16237	1.16237	1	0
4	141	-2	-3.92246	3.92246	0	0
4	142	-4	6.61364	6.61364	1	0
4	143	-8	-4.73295	4.73295	0	0
4	144	-8	3.63903	3.63903	1	0
4	145	-4	-0.56608	0.56608	0	0
4	146	-5	9.72399	9.72399	1	0
4	147	-6	0.14933	0.14933	1	0
4	148	-4	0.528228	0.528228	1	0
4	149	-3	-4.57307	4.57307	0	0
4	150	-6	-1.63068	1.63068	0	0
4	151	-7	-2.46664	2.46664	0	0
4	152	-7	8.31181	8.31181	1	0
4	153	-8	6.31841	6.31841	1	0
4	154	-10	-7.24529	7.24529	0	0
4	155	-7	6.79036	6.79036	1	0
4	156	-7	2.56206	2.56206	1	0
4	157	-3	2.44088	2.44088	1	0
4	158	-6	0.384087	0.384087	1	0
4	159	-4	0.735416	0.735416	1	0
4	160	-8	-0.634894	0.634894	0	0
4	161	-6	-2.49584	2.49584	0	0
4	162	-6	1.53393	1.53393	1	0
4	163	-4	-6.07935	6.07935	0	0
4	164	-9	-12.9133	12.9133	0	0
4	165	-10	-0.0297322	0.0297322	0	0
4	166	-4	-8.23509	8.23509	0	0
4	167	-5	-2.68755	2.68755	0	0
4	168	-4	10.695	10.695	1	0
4	169	-6	3.36531	3.36531	1	0
4	170	-2	4.71881	4.71881	1	0
4	171	-4	-5.99959	5.99959	0	0
4	172	-8	-13.7209	13.7209	0	0
4	173	-6	2.52107	2.52107	1	0
4	174	-5	-2.80134	2.80134	0	0
4	175	-9	-1.27217	1.27217	0	0
4	176	-3	2.80527	2.80527	1	0
4	177	-5	3.083	3.083	1	0
4	178	-3	6.06	6.06	1	0
4	179	-9	7.77184	7.77184	1	0
4	180	-5	-5.31462	5.31462	0	0
4	181	-8	2.6822	2.6822	1	0
4	182	-4	0.916038	0.916038	1	0
4	183	-5	-4.19457	4.19457	0	0
4	184	-4	-1.03075	1.03075	0	0
4	185	-5	4.56347	4.56347	1	0
4	186	-3	-4.89638	4.89638	0	0
4	187	-7	4.72943	4.72943	1	0
4	188	-6	0.477438	0.477438	1	0
4	189	8	-18.9491	18.9491	0	0
4	190	-8	2.3202	2.3202	1	0
4	191	-6	-1.4234	1.4234	0	0
4	192	-9	5.65101	5.65101	1	0
4	193	-8	4.60212	4.60212	1	0
4	194	3	6.44258	6.44258	1	0
4	195	-7	7.54864	7.54864	1	0
4	196	-5	9.97768	9.97768	1	0
4	197	-7	-2.87737	2.87737	0	0
4	198	-7	0.244159	0.244159	1	0
4	199	-4	-2.89543	2.89543	0	0
4	200	-5	1.65686	1.65686	1	0
5	1	4	8.5956	8.5956	1	0
5	2	-4	-12.9416	12.9416	0	0
5	3	-10	3.34412	3.34412	1	0
5	4	0	-1.20977	1.20977	0	0
5	5	2	2.92852	2.92852	1	0
5	6	1	6.53826	6.53826	1	0
5	7	21	8.08146	8.08146	1	0
5	8	3	-3.87508	3.87508	0	0
5	9	3	-3.36684	3.36684	0	0
5	10	-1	4.35907	4.35907	1	0
5	11	6	-3.45741	3.45741	0	0
5	12	-6	-3.42497	3.42497	0	0
5	13	10	-2.38516	2.38516	0	0
5	14	9	2.09565	2.09565	1	0
5	15	11	8.63201	8.63201	1	0
5	16	4	-3.92647	3.92647	0	0
5	17	-3	6.81279	6.81279	1	0
5	18	9	-0.0157516	0.0157516	0	0
5	19	-10	-11.8832	11.8832	0	0
5	20	-5	-2.92303	2.92303	0	0
5	21	3	5.94354	5.94354	1	0
5	22	11	1.61658	1.61658	1	0
5	23	-5	-0.0318402	0.0318402	0	0
5	24	2	0.99663	0.99663	1	0
5	25	4	4.36305	4.36305	1	0
5	26	2	-5.63094	5.63094	0	0
5	27	7	1.96117	1.96117	1	0
5	28	0	4.42145	4.42145	1	0
5	29	3	-7.37088	7.37088	0	0
5	30	-2	-2.0957	2.0957	0	0
5	31	0	4.8298	4.8298	1	0
5	32	1	-0.99997	0.99997	0	0
5	33	5	-3.16811	3.16811	0	0
5	34	3	6.38655	6.38655	1	0
5	35	-4	-2.85223	2.85223	0	0
5	36	7	-9.01758	9.01758	0	0
5	37	6	0.85459	0.85459	1	0
5	38	9	-8.49967	8.49967	0	0
5	39	-5	-5.23766	5.23766	0	0
5	40	-2	4.69398	4.69398	1	0
5	41	-5	-4.41069	4.41069	0	0
5	42	0	-3.52938	3.52938	0	0
5	43	12	-0.690138	0.690138	0	0
5	44	11	7.91845	7.91845	1	0
5	45	-4	-2.06169	2.06169	0	0
5	46	3	-0.427654	0.427654	0	0
5	47	4	15.0659	15.0659	1	0
5	48	10	5.4158	5.4158	1	0
5	49	5	-1.97503	1.97503	0	0
5	50	5	0.842459	0.842459	1	0
5	51	-3	4.19281	4.19281	1	0
5	52	-2	2.64011	2.64011	1	0
5	53	7	3.68989	3.68989	1	0
5	54	5	-2.05496	2.05496	0	0
5	55	10	8.90259	8.90259	1	0
5	56	9	-5.12921	5.12921	0	0
5	57	5	-9.15218	9.15218	0	0
5	58	4	-10.4505	10.4505	0	0
5	59	2	-1.15167	1.15167	0	0
5	60	-1	4.15115	4.15115	1	0
5	61	4	4.44957	4.44957	1	0
5	62	-2	-8.97485	8.97485	0	0
5	63	3	5.90057	5.90057	1	0
5	64	5	-2.94662	2.94662	0	0
5	65	4	2.65559	2.65559	1	0
5	66	-4	4.2949	4.2949	1	0
5	67	-2	-5.95501	5.95501	0	0
5	68	1	7.28227	7.28227	1	0
5	69	0	-0.0117084	0.0117084	0	0
5	70	0	-8.83632	8.83632	0	0
5	71	5	-8.36253	8.36253	0	0
5	72	-4	2.05045	2.05045	1	0
5	73	3	2.76648	2.76648	1	0
5	74	3	-5.87121	5.87121	0	0
5	75	4	7.77607	7.77607	1	0
5	76	-4	-1.94707	1.94707	0	0
5	77	2	4.55617	4.55617	1	0
5	78	3	0.828142	0.828142	1	0
5	79	-6	0.693603	0.693603	1	0
5	80	4	-1.2361	1.2361	0	0
5	81	5	-1.29961	1.29961	0	0
5	82	5	4.59122	4.59122	1	0
5	83	1	-2.3015	2.3015	0	0
5	84	3	-4.19004	4.19004	0	0
5	85	1	0.436933	0.436933	1	0
5	86	3	-5.82856	5.82856	0	0
5	87	4	-2.95606	2.95606	0	0
5	88	3	6.89021	6.89021	1	0
5	89	-6	1.05101	1.05101	1	0
5	90	14	12.7924	12.7924	1	0
5	91	4	3.81933	3.81933	1	0
5	92	4	-3.33827	3.33827	0	0
5	93	4	-2.11736	2.11736	0	0
5	94	9	-18.6529	18.6529	0	0
5	95	0	8.84243	8.84243	1	0
5	96	3	3.09752	3.09752	1	0
5	97	7	-7.68842	7.68842	0	0
5	98	-4	4.76527	4.76527	1	0
5	99	3	-2.03501	2.03501	0	0
5	100	4	2.69502	2.69502	1	0
5	101	-5	-1.18987	1.18987	0	0
5	102	5	-7.40286	7.40286	0	0
5	103	2	10.281	10.281	1	0
5	104	4	0.631627	0.631627	1	0
5	105	5	-0.252641	0.252641	0	0
5	106	4	1.32695	1.32695	1	0
5	107	1	3.57603	3.57603	1	0
5	108	2	9.08141	9.08141	1	0
5	109	0	1.01155	1.01155	1	0
5	110	5	-5.09921	5.09921	0	0
5	111	4	3.34469	3.34469	1	0
5	112	4	-4.13782	4.13782	0	0
5	113	4	-1.90152	1.90152	0	0
5	114	2	-1.43224	1.43224	0	0
5	115	3	-4.52243	4.52243	0	0
5	116	1	0.253864	0.253864	1	0
5	117	2	1.62864	1.62864	1	0
5	118	5	-1.81309	1.81309	0	0
5	119	3	3.29673	3.29673	1	0
5	120	4	-2.30243	2.30243	0	0
5	121	5	1.72149	1.72149	1	0
5	122	3	-9.93366	9.93366	0	0
5	123	3	16.3324	16.3324	1	0
5	124	2	-0.690643	0.690643	0	0
5	125	5	-9.34962	9.34962	0	0
5	126	1	-0.141494	0.141494	0	0
5	127	7	-6.85762	6.85762	0	0
5	128	1	-1.90715	1.90715	0	0
5	129	4	6.59284	6.59284	1	0
5	130	2	-3.02003	3.02003	0	0
5	131	4	-7.17433	7.17433	0	0
5	132	1	-5.96106	5.96106	0	0
5	133	-4	4.90961	4.90961	1	0
5	134	1	0.0189954	0.0189954	1	0
5	135	6	-1.59205	1.59205	0	0
5	136	5	0.455822	0.455822	1	0
5	137	3	-1.12204	1.12204	0	0
5	138	8	-0.197955	0.197955	0	0
5	139	-3	1.94858	1.94858	1	0
5	140	3	0.409652	0.409652	1	0
5	141	5	2.21437	2.21437	1	0
5	142	5	6.25428	6.25428	1	0
5	143	5	0.824834	0.824834	1	0
5	144	7	10.9579	10.9579	1	0
5	145	6	8.806	8.806	1	0
5	146	6	-3.61879	3.61879	0	0
5	147	2	2.60795	2.60795	1	0
5	148	-3	-11.3197	11.3197	0	0
5	149	7	1.227	1.227	1	0
5	150	4	-3.4111	3.4111	0	0
5	151	2	-5.13804	5.13804	0	0
5	152	6	6.75583	6.75583	1	0
5	153	3	1.49921	1.49921	1	0
5	154	2	1.89677	1.89677	1	0
5	155	-5	-11.9063	11.9063	0	0
5	156	4	1.40494	1.40494	1	0
5	157	3	20.0878	20.0878	1	0
5	158	2	-4.2387	4.2387	0	0
5	159	2	1.57667	1.57667	1	0
5	160	2	1.71958	1.71958	1	0
5	161	1	-1.85092	1.85092	0	0
5	162	-4	0.284788	0.284788	1	0
5	163	-5	-9.55626	9.55626	0	0
5	164	3	-4.4514	4.4514	0	0
5	165	5	2.38081	2.38081	1	0
5	166	-5	2.54513	2.54513	1	0
5	167	2	-4.88955	4.88955	0	0
5	168	3	-10.1655	10.1655	0	0
5	169	3	9.17613	9.17613	1	0
5	170	2	-1.73004	1.73004	0	0
5	171	2	1.3721	1.3721	1	0
5	172	-6	-2.89142	2.89142	0	0
5	173	2	1.4573	1.4573	1	0
5	174	3	-0.841063	0.841063	0	0
5	175	4	-9.55417	9.55417	0	0
5	176	-3	8.6466	8.6466	1	0
5	177	1	2.78926	2.78926	1	0
5	178	4	-4.29093	4.29093	0	0
5	179	7	6.00399	6.00399	1	0
5	180	2	0.510485	0.510485	1	0
5	181	4	8.93568	8.93568	1	0
5	182	-3	-7.57635	7.57635	0	0
5	183	2	-2.94784	2.94784	0	0
5	184	1	-3.70163	3.70163	0	0
5	185	-4	-1.37948	1.37948	0	0
5	186	0	10.3191	10.3191	1	0
5	187	2	-6.67737	6.67737	0	0
5	188	3	2.14135	2.14135	1	0
5	189	3	9.11456	9.11456	1	0
5	190	2	-4.4899	4.4899	0	0
5	191	-3	-5.32532	5.32532	0	0
5	192	2	0.690484	0.690484	1	0
5	193	20	-0.778233	0.778233	0	0
5	194	-6	3.55902	3.55902	1	0
5	195	4	4.11322	4.11322	1	0
5	196	-1	-7.67769	7.67769	0	0
5	197	-4	-4.85373	4.85373	0	0
5	198	4	5.33488	5.33488	1	0
5	199	4	-0.882805	0.882805	0	0
5	200	5	10.39	10.39	1	0
6	1	1	-4.52702	4.52702	0	0
6	2	0	6.05477	6.05477	1	0
6	3	0	3.765	3.765	1	0
6	4	0	8.12212	8.12212	1	0
6	5	0	-5.81015	5.81015	0	0
6	6	0	-2.21959	2.21959	0	0
6	7	0	-4.60522	4.60522	0	0
6	8	0	-3.48714	3.48714	0	0
6	9	0	-5.28843	5.28843	0	0
6	10	0	1.81988	1.81988	1	0
6	11	0	2.06484	2.06484	1	0
6	12	0	3.29781	3.29781	1	0
6	13	0	-4.23273	4.23273	0	0
6	14	0	5.15052	5.15052	1	0
6	15	0	-4.15142	4.15142	0	0
6	16	0	5.21774	5.21774	1	0
6	17	0	6.82532	6.82532	1	0
6	18	0	-0.474783	0.474783	0	0
6	19	0	-1.65177	1.65177	0	0
6	20	0	1.55778	1.55778	1	0
6	21	0	-13.2935	13.2935	0	0
6	22	0	13.0746	13.0746	1	0
6	23	0	-3.43395	3.43395	0	0
6	24	0	2.48563	2.48563	1	0
6	25	0	1.82191	1.82191	1	0
6	26	0	0.682199	0.682199	1	0
6	27	0	4.1696	4.1696	1	0
6	28	0	-1.12475	1.12475	0	0
6	29	0	-10.4337	10.4337	0	0
6	30	0	3.74436	3.74436	1	0
6	31	0	-2.1885	2.1885	0	0
6	32	1	5.69145	5.69145	1	0
6	33	0	0.638639	0.638639	1	0
6	34	0	-2.97323	2.97323	0	0
6	35	0	-1.24297	1.24297	0	0
6	36	0	-2.95587	2.95587	0	0
6	38	0	4.02128	4.02128	1	0
6	39	0	-5.48467	5.48467	0	0
6	40	0	4.87914	4.87914	1	0
6	41	0	5.00907	5.00907	1	0
6	42	0	2.26294	2.26294	1	0
6	43	0	-2.46957	2.46957	0	0
6	44	0	-1.91753	1.91753	0	0
6	45	0	-6.08904	6.08904	0	0
6	46	0	3.83996	3.83996	1	0
6	47	0	-10.0266	10.0266	0	0
6	48	0	1.55337	1.55337	1	0
6	49	0	7.61244	7.61244	1	0
6	50	0	4.29025	4.29025	1	0
6	51	0	5.22024	5.22024	1	0
6	52	0	-7.09837	7.09837	0	0
6	53	0	0.328486	0.328486	1	0
6	54	0	-2.35488	2.35488	0	0
6	55	0	8.75773	8.75773	1	0
6	56	0	-1.16657	1.16657	0	0
6	57	0	-3.39413	3.39413	0	0
6	58	0	1.18325	1.18325	1	0
6	59	0	1.06776	1.06776	1	0
6	60	0	3.06068	3.06068	1	0
6	61	0	-2.73917	2.73917	0	0
6	62	0	6.18144	6.18144	1	0
6	63	0	5.75177	5.75177	1	0
6	64	0	-1.6933	1.6933	0	0
6	65	0	3.47156	3.47156	1	0
6	66	-1	-1.86519	1.86519	0	0
6	67	0	2.63746	2.63746	1	0
6	68	0	-6.89927	6.89927	0	0
6	69	1	5.19637	5.19637	1	0
6	70	1	-6.31514	6.31514	0	0
6	71	0	1.00137	1.00137	1	0
6	72	-1	0.838635	0.838635	1	0
6	73	0	-3.96636	3.96636	0	0
6	74	0	-6.64332	6.64332	0	0
6	75	0	3.7654	3.7654	1	0
6	76	1	11.6176	11.6176	1	0
6	77	0	-2.11289	2.11289	0	0
6	78	0	-5.67358	5.67358	0	0
6	79	0	4.53854	4.53854	1	0
6	80	0	-10.7307	10.7307	0	0
6	81	0	-2.41596	2.41596	0	0
6	82	0	-2.22659	2.22659	0	0
6	83	0	-0.782701	0.782701	0	0
6	84	0	5.86712	5.86712	1	0
6	85	0	2.11138	2.11138	1	0
6	86	0	7.0762	7.0762	1	0
6	87	0	-6.3991	6.3991	0	0
6	88	0	4.12929	4.12929	1	0
6	89	0	-3.9908	3.9908	0	0
6	90	0	1.40788	1.40788	1	0
6	91	0	6.53695	6.53695	1	0
6	92	0	-1.73311	1.73311	0	0
6	93	0	-5.42963	5.42963	0	0
6	94	1	-5.40489	5.40489	0	0
6	95	0	0.16913	0.16913	1	0
6	96	0	-3.71964	3.71964	0	0
6	97	0	0.74254	0.74254	1	0
6	98	0	-1.46971	1.46971	0	0
6	99	0	0.650529	0.650529	1	0
6	100	0	1.39202	1.39202	1	0
6	101	1	-8.81985	8.81985	0	0
6	102	0	-3.70314	3.70314	0	0
6	103	0	4.49384	4.49384	1	0
6	104	0	5.04566	5.04566	1	0
6	105	0	-4.19085	4.19085	0	0
6	106	0	1.6622	1.6622	1	0
6	107	0	-8.24299	8.24299	0	0
6	108	0	1.12126	1.12126	1	0
6	109	-1	10.0531	10.0531	1	0
6	110	0	7.50091	7.50091	1	0
6	111	0	3.09087	3.09087	1	0
6	112	0	9.93627	9.93627	1	0
6	113	0	-2.29492	2.29492	0	0
6	114	0	-0.639472	0.639472	0	0
6	115	0	-2.20754	2.20754	0	0
6	116	0	-3.33225	3.33225	0	0
6	117	0	-4.13537	4.13537	0	0
6	118	0	-4.85954	4.85954	0	0
6	119	0	0.587282	0.587282	1	0
6	120	0	-5.96776	5.96776	0	0
6	121	0	-0.59546	0.59546	0	0
6	122	0	-10.9832	10.9832	0	0
6	123	0	3.61039	3.61039	1	0
6	124	1	2.8176	2.8176	1	0
6	125	0	-0.0421499	0.0421499	0	0
6	126	-1	1.49493	1.49493	1	0
6	127	1	-3.5799	3.5799	0	0
6	128	1	7.55074	7.55074	1	0
6	129	-1	-10.3547	10.3547	0	0
6	130	0	6.74739	6.74739	1	0
6	131	0	0.111589	0.111589	1	0
6	132	0	1.98165	1.98165	1	0
6	133	0	-8.26849	8.26849	0	0
6	134	0	8.73119	8.73119	1	0
6	135	0	-5.41202	5.41202	0	0
6	136	1	-0.789624	0.789624	0	0
6	137	1	5.35283	5.35283	1	0
6	138	0	2.11795	2.11795	1	0
6	139	0	-2.14343	2.14343	0	0
6	140	0	-1.66258	1.66258	0	0
6	141	0	1.04835	1.04835	1	0
6	142	0	-0.721455	0.721455	0	0
6	143	0	1.38185	1.38185	1	0
6	144	0	-5.11135	5.11135	0	0
6	145	0	11.95	11.95	1	0
6	146	0	2.46458	2.46458	1	0
6	147	0	2.12101	2.12101	1	0
6	148	0	0.935786	0.935786	1	0
6	149	0	-5.94044	5.94044	0	0
6	150	0	4.18219	4.18219	1	0
6	151	1	-5.00128	5.00128	0	0
6	152	0	-0.302531	0.302531	0	0
6	153	0	-7.78615	7.78615	0	0
6	154	0	4.89512	4.89512	1	0
6	155	0	-4.20101	4.20101	0	0
6	156	0	-0.299825	0.299825	0	0
6	157	0	0.554604	0.554604	1	0
6	158	0	-3.42709	3.42709	0	0
6	159	0	8.59788	8.59788	1	0
6	160	0	0.427475	0.427475	1	0
6	161	-1	6.17141	6.17141	1	0
6	162	0	-8.06643	8.06643	0	0
6	163	0	4.62236	4.62236	1	0
6	164	0	0.324985	0.324985	1	0
6	165	0	-3.90815	3.90815	0	0
6	166	0	0.133146	0.133146	1	0
6	167	0	0.713137	0.713137	1	0
6	168	0	-5.22249	5.22249	0	0
6	169	0	10.835	10.835	1	0
6	170	0	-1.3147	1.3147	0	0
6	171	0	-0.381499	0.381499	0	0
6	172	0	4.74119	4.74119	1	0
6	173	0	5.68586	5.68586	1	0
6	174	0	-9.14987	9.14987	0	0
6	176	0	0.865793	0.865793	1	0
6	177	0	5.64599	5.64599	1	0
6	178	0	-6.33158	6.33158	0	0
6	179	0	-1.43672	1.43672	0	0
6	180	0	0.576069	0.576069	1	0
6	181	0	-4.06887	4.06887	0	0
6	182	0	-8.31852	8.31852	0	0
6	183	0	1.89415	1.89415	1	0
6	184	0	-2.92492	2.92492	0	0
6	185	0	-3.92545	3.92545	0	0
6	186	0	10.312	10.312	1	0
6	187	0	-4.32707	4.32707	0	0
6	188	0	6.85231	6.85231	1	0
6	189	0	-1.63318	1.63318	0	0
6	190	0	6.26306	6.26306	1	0
6	191	0	8.18927	8.18927	1	0
6	192	0	-5.50028	5.50028	0	0
6	193	0	3.0125	3.0125	1	0
6	194	1	-2.74197	2.74197	0	0
6	195	0	-9.40641	9.40641	0	0
6	197	-1	6.91842	6.91842	1	0
6	198	0	-0.31944	0.31944	0	0
6	199	0	-6.26398	6.26398	0	0
6	200	0	-4.57125	4.57125	0	0
7	1	0	-13.9112	13.9112	0	0
7	2	0	0.947151	0.947151	1	0
7	4	0	5.45035	5.45035	1	0
7	5	0	-6.58192	6.58192	0	0
7	6	0	-5.20532	5.20532	0	0
7	7	0	2.47778	2.47778	1	0
7	8	0	5.48714	5.48714	1	0
7	9	0	-0.72657	0.72657	0	0
7	10	0	1.51951	1.51951	1	0
7	11	0	4.7074	4.7074	1	0
7	12	0	-3.59813	3.59813	0	0
7	13	-1	-8.82386	8.82386	0	0
7	14	0	0.445586	0.445586	1	0
7	15	0	0.0925274	0.0925274	1	0
7	16	0	7.66223	7.66223	1	0
7	17	0	8.76723	8.76723	1	0
7	18	0	-7.3177	7.3177	0	0
7	19	0	-4.49679	4.49679	0	0
7	20	0	1.51871	1.51871	1	0
7	21	0	-1.24269	1.24269	0	0
7	22	0	-1.21782	1.21782	0	0
7	23	0	0.448097	0.448097	1	0
7	24	0	8.52274	8.52274	1	0
7	25	-1	-10.8554	10.8554	0	0
7	26	0	1.98769	1.98769	1	0
7	27	0	0.534584	0.534584	1	0
7	28	0	1.41236	1.41236	1	0
7	29	-1	0.135977	0.135977	1	0
7	30	0	-1.67813	1.67813	0	0
7	31	0	-0.513171	0.513171	0	0
7	32	0	5.02786	5.02786	1	0
7	33	1	5.07515	5.07515	1	0
7	34	0	-10.3234	10.3234	0	0
7	35	0	2.75809	2.75809	1	0
7	36	0	-2.01125	2.01125	0	0
7	37	0	14.1165	14.1165	1	0
7	38	0	11.3375	11.3375	1	0
7	39	0	-3.75087	3.75087	0	0
7	40	0	-7.28276	7.28276	0	0
7	41	0	1.09443	1.09443	1	0
7	42	0	-3.77497	3.77497	0	0
7	43	0	-2.02923	2.02923	0	0
7	44	0	-8.36039	8.36039	0	0
7	45	0	12.3815	12.3815	1	0
7	46	0	0.490642	0.490642	1	0
7	47	0	0.958958	0.958958	1	0
7	48	0	-4.76619	4.76619	0	0
7	49	0	9.22824	9.22824	1	0
7	50	0	2.67558	2.67558	1	0
7	51	0	4.191	4.191	1	0
7	52	0	-4.66329	4.66329	0	0
7	53	0	0.10887	0.10887	1	0
7	54	0	3.48718	3.48718	1	0
7	55	0	4.86596	4.86596	1	0
7	56	0	-7.69944	7.69944	0	0
7	57	0	-5.27186	5.27186	0	0
7	58	0	-1.07157	1.07157	0	0
7	59	0	4.04835	4.04835	1	0
7	60	0	0.843979	0.843979	1	0
7	61	0	-5.78462	5.78462	0	0
7	62	0	0.26048	0.26048	1	0
7	63	0	-3.80972	3.80972	0	0
7	64	0	-5.7557	5.7557	0	0
7	65	0	0.184475	0.184475	1	0
7	66	-1	5.195	5.195	1	0
7	67	0	-0.0655787	0.0655787	0	0
7	68	0	7.92509	7.92509	1	0
7	69	0	0.362133	0.362133	1	0
7	70	0	-8.33501	8.33501	0	0
7	71	0	8.16199	8.16199	1	0
7	72	0	1.23238	1.23238	1	0
7	73	0	-7.46512	7.46512	0	0
7	74	0	3.99849	3.99849	1	0
7	75	-1	4.28273	4.28273	1	0
7	76	0	0.749381	0.749381	1	0
7	77	0	4.63565	4.63565	1	0
7	78	0	-0.583637	0.583637	0	0
7	79	0	-3.56949	3.56949	0	0
7	80	-1	7.13764	7.13764	1	0
7	81	0	-0.944187	0.944187	0	0
7	82	0	-5.44513	5.44513	0	0
7	83	0	12.8193	12.8193	1	0
7	84	0	-5.77495	5.77495	0	0
7	85	0	-3.11684	3.11684	0	0
7	86	0	4.31423	4.31423	1	0
7	87	0	-0.0616699	0.0616699	0	0
7	88	0	-13.8408	13.8408	0	0
7	89	0	2.47196	2.47196	1	0
7	90	0	-0.254977	0.254977	0	0
7	91	0	-1.83168	1.83168	0	0
7	92	0	-1.67522	1.67522	0	0
7	93	0	1.6354	1.6354	1	0
7	94	0	-0.95573	0.95573	0	0
7	95	0	-8.44206	8.44206	0	0
7	96	0	0.635493	0.635493	1	0
7	97	-1	9.78203	9.78203	1	0
7	98	0	-2.00036	2.00036	0	0
7	99	-1	5.5419	5.5419	1	0
7	100	0	2.83008	2.83008	1	0
7	101	0	-3.63921	3.63921	0	0
7	102	0	-2.26665	2.26665	0	0
7	103	0	-0.148144	0.148144	0	0
7	104	0	-1.03199	1.03199	0	0
7	105	0	-0.305911	0.305911	0	0
7	106	0	-1.47944	1.47944	0	0
7	107	0	-3.2264	3.2264	0	0
7	108	0	-2.18054	2.18054	0	0
7	109	0	5.0653	5.0653	1	0
7	110	0	1.90194	1.90194	1	0
7	111	0	4.56895	4.56895	1	0
7	112	0	-0.188608	0.188608	0	0
7	113	0	-2.93391	2.93391	0	0
7	114	0	-1.33501	1.33501	0	0
7	115	0	-7.94083	7.94083	0	0
7	116	0	0.66321	0.66321	1	0
7	117	0	-0.757423	0.757423	0	0
7	118	0	1.08423	1.08423	1	0
7	119	-1	-0.800588	0.800588	0	0
7	120	0	9.19477	9.19477	1	0
7	121	0	-5.25529	5.25529	0	0
7	122	0	1.21011	1.21011	1	0
7	123	0	0.354937	0.354937	1	0
7	124	0	1.97325	1.97325	1	0
7	125	0	-7.77845	7.77845	0	0
7	126	0	1.22248	1.22248	1	0
7	127	0	-3.71621	3.71621	0	0
7	128	0	4.77304	4.77304	1	0
7	129	0	6.86047	6.86047	1	0
7	130	0	4.1142	4.1142	1	0
7	131	0	6.02137	6.02137	1	0
7	132	0	3.76958	3.76958	1	0
7	133	0	1.87849	1.87849	1	0
7	134	0	-3.52984	3.52984	0	0
7	135	0	-2.26851	2.26851	0	0
7	136	0	1.3823	1.3823	1	0
7	137	0	4.78685	4.78685	1	0
7	138	0	-2.59819	2.59819	0	0
7	139	0	2.59128	2.59128	1	0
7	140	-1	-3.62131	3.62131	0	0
7	141	0	-10.5248	10.5248	0	0
7	142	0	-1.09913	1.09913	0	0
7	143	0	3.72121	3.72121	1	0
7	144	0	1.39947	1.39947	1	0
7	145	0	5.60333	5.60333	1	0
7	146	-1	5.50077	5.50077	1	0
7	147	0	-6.3763	6.3763	0	0
7	148	0	8.42538	8.42538	1	0
7	149	0	2.97272	2.97272	1	0
7	150	-1	-2.58229	2.58229	0	0
7	151	0	9.6613	9.6613	1	0
7	152	0	6.83986	6.83986	1	0
7	153	0	-0.0331074	0.0331074	0	0
7	154	0	-10.6427	10.6427	0	0
7	155	0	5.00857	5.00857	1	0
7	156	0	-7.38002	7.38002	0	0
7	157	0	4.33627	4.33627	1	0
7	158	0	5.40826	5.40826	1	0
7	159	0	-9.44158	9.44158	0	0
7	160	0	-3.19025	3.19025	0	0
7	161	0	9.40209	9.40209	1	0
7	162	0	-8.02186	8.02186	0	0
7	163	0	1.78787	1.78787	1	0
7	164	0	5.02132	5.02132	1	0
7	165	0	-7.19289	7.19289	0	0
7	166	0	-4.5911	4.5911	0	0
7	167	0	4.45272	4.45272	1	0
7	168	0	0.207307	0.207307	1	0
7	169	0	1.30845	1.30845	1	0
7	170	0	2.88129	2.88129	1	0
7	171	0	0.0864878	0.0864878	1	0
7	172	0	4.29622	4.29622	1	0
7	173	0	-11.3945	11.3945	0	0
7	174	1	-2.72834	2.72834	0	0
7	175	0	4.04247	4.04247	1	0
7	176	0	1.7393	1.7393	1	0
7	177	0	-0.0418579	0.0418579	0	0
7	178	0	0.0704001	0.0704001	1	0
7	179	-1	-5.63014	5.63014	0	0
7	180	0	-8.31144	8.31144	0	0
7	181	0	0.204211	0.204211	1	0
7	182	-1	12.4184	12.4184	1	0
7	183	0	-5.73108	5.73108	0	0
7	184	0	7.31741	7.31741	1	0
7	185	0	1.84889	1.84889	1	0
7	186	0	-7.67611	7.67611	0	0
7	187	0	5.06031	5.06031	1	0
7	188	0	-5.53002	5.53002	0	0
7	189	0	1.16822	1.16822	1	0
7	190	0	-0.635484	0.635484	0	0
7	191	0	4.37892	4.37892	1	0
7	192	0	-11.6163	11.6163	0	0
7	193	0	1.04047	1.04047	1	0
7	194	-1	-5.49153	5.49153	0	0
7	195	0	3.1513	3.1513	1	0
7	196	0	4.35634	4.35634	1	0
7	197	0	11.5803	11.5803	1	0
7	198	0	2.11269	2.11269	1	0
7	199	0	-0.241423	0.241423	0	0
7	200	0	0.784184	0.784184	1	0
8	1	0	-2.64692	2.64692	0	0
8	2	0	-0.715917	0.715917	0	0
8	3	0	-1.10678	1.10678	0	0
8	4	0	-0.04255	0.04255	0	0
8	5	0	8.99728	8.99728	1	0
8	6	0	1.87114	1.87114	1	0
8	7	0	3.88895	3.88895	1	0
8	8	1	-1.37387	1.37387	0	0
8	9	0	2.45837	2.45837	1	0
8	10	0	-1.00875	1.00875	0	0
8	11	0	-5.32527	5.32527	0	0
8	12	0	-4.21009	4.21009	0	0
8	14	0	-6.70561	6.70561	0	0
8	15	0	-2.79515	2.79515	0	0
8	16	0	-0.988964	0.988964	0	0
8	17	0	3.09335	3.09335	1	0
8	18	0	0.0235398	0.0235398	1	0
8	19	0	4.38213	4.38213	1	0
8	20	0	3.99375	3.99375	1	0
8	21	0	-4.10345	4.10345	0	0
8	22	-1	-0.943292	0.943292	0	0
8	23	0	0.117647	0.117647	1	0
8	24	0	6.18027	6.18027	1	0
8	25	0	-2.89194	2.89194	0	0
8	26	0	-0.0959377	0.0959377	0	0
8	27	0	-4.65799	4.65799	0	0
8	28	0	-3.71642	3.71642	0	0
8	29	0	-0.649189	0.649189	0	0
8	30	0	-3.25597	3.25597	0	0
8	31	0	3.54751	3.54751	1	0
8	32	0	7.30991	7.30991	1	0
8	33	0	-1.82572	1.82572	0	0
8	34	1	-5.3972	5.3972	0	0
8	35	0	2.72083	2.72083	1	0
8	36	-1	1.15767	1.15767	1	0
8	37	0	-0.560847	0.560847	0	0
8	38	0	6.81793	6.81793	1	0
8	39	0	-4.03076	4.03076	0	0
8	40	0	3.78247	3.78247	1	0
8	41	-1	-3.38682	3.38682	0	0
8	42	0	0.117101	0.117101	1	0
8	43	0	5.08287	5.08287	1	0
8	44	0	-0.140569	0.140569	0	0
8	45	0	4.94093	4.94093	1	0
8	46	0	4.9877	4.9877	1	0
8	47	0	3.2618	3.2618	1	0
8	48	0	0.807875	0.807875	1	0
8	49	0	-3.05942	3.05942	0	0
8	50	0	-4.61826	4.61826	0	0
8	52	0	10.1205	10.1205	1	0
8	53	1	-10.4127	10.4127	0	0
8	54	0	-8.33703	8.33703	0	0
8	55	0	1.7864	1.7864	1	0
8	56	0	-1.78543	1.78543	0	0
8	57	0	-0.564855	0.564855	0	0
8	58	0	-0.733729	0.733729	0	0
8	59	0	-3.50224	3.50224	0	0
8	60	1	-9.7257	9.7257	0	0
8	61	0	9.28842	9.28842	1	0
8	62	0	-2.18311	2.18311	0	0
8	63	0	3.29111	3.29111	1	0
8	64	0	-3.0861	3.0861	0	0
8	65	0	-2.16333	2.16333	0	0
8	66	0	17.7155	17.7155	1	0
8	67	0	10.8643	10.8643	1	0
8	68	0	-4.45925	4.45925	0	0
8	69	0	-10.2603	10.2603	0	0
8	70	0	0.990084	0.990084	1	0
8	71	0	5.74313	5.74313	1	0
8	72	0	2.47383	2.47383	1	0
8	73	0	-9.14275	9.14275	0	0
8	74	0	4.75829	4.75829	1	0
8	75	0	-5.15235	5.15235	0	0
8	76	0	2.67791	2.67791	1	0
8	77	0	-6.93184	6.93184	0	0
8	78	0	-1.91075	1.91075	0	0
8	79	0	3.07006	3.07006	1	0
8	80	0	-3.48784	3.48784	0	0
8	81	0	2.99259	2.99259	1	0
8	82	0	0.00668367	0.00668367	1	0
8	83	0	4.77956	4.77956	1	0
8	84	0	-10.6009	10.6009	0	0
8	85	0	10.7675	10.7675	1	0
8	86	0	3.21028	3.21028	1	0
8	87	0	2.76445	2.76445	1	0
8	88	0	-0.398138	0.398138	0	0
8	89	0	6.53551	6.53551	1	0
8	90	0	-4.56613	4.56613	0	0
8	92	0	2.30528	2.30528	1	0
8	93	0	-12.9975	12.9975	0	0
8	94	0	-0.16308	0.16308	0	0
8	95	0	-1.22565	1.22565	0	0
8	96	0	0.968679	0.968679	1	0
8	97	0	-6.34348	6.34348	0	0
8	98	0	8.44375	8.44375	1	0
8	99	1	0.459957	0.459957	1	0
8	100	0	-3.10591	3.10591	0	0
8	101	0	-1.027	1.027	0	0
8	102	0	-2.88595	2.88595	0	0
8	103	0	-0.0523127	0.0523127	0	0
8	104	0	-8.0119	8.0119	0	0
8	105	0	-2.93633	2.93633	0	0
8	106	0	4.36759	4.36759	1	0
8	107	0	-5.02592	5.02592	0	0
8	108	0	6.08242	6.08242	1	0
8	109	-1	0.702923	0.702923	1	0
8	110	0	-1.81198	1.81198	0	0
8	111	0	11.3808	11.3808	1	0
8	112	0	-0.0602901	0.0602901	0	0
8	113	0	-2.8075	2.8075	0	0
8	114	0	3.5103	3.5103	1	0
8	115	0	1.76096	1.76096	1	0
8	116	0	-6.39045	6.39045	0	0
8	117	0	5.67063	5.67063	1	0
8	118	0	2.97414	2.97414	1	0
8	119	0	0.962791	0.962791	1	0
8	120	0	-1.23898	1.23898	0	0
8	121	0	6.04216	6.04216	1	0
8	122	-1	2.26329	2.26329	1	0
8	123	0	1.08842	1.08842	1	0
8	124	-2	-1.75518	1.75518	0	0
8	125	0	-0.434682	0.434682	0	0
8	126	-2	3.49337	3.49337	1	0
8	127	0	-9.0117	9.0117	0	0
8	128	0	2.37197	2.37197	1	0
8	129	0	6.09583	6.09583	1	0
8	130	0	-3.66483	3.66483	0	0
8	131	0	-2.55317	2.55317	0	0
8	132	0	8.3361	8.3361	1	0
8	133	0	-8.48245	8.48245	0	0
8	134	1	2.74768	2.74768	1	0
8	135	0	-9.53215	9.53215	0	0
8	136	0	-5.21357	5.21357	0	0
8	137	0	-1.52602	1.52602	0	0
8	138	0	1.62611	1.62611	1	0
8	139	0	-0.393403	0.393403	0	0
8	140	0	3.99685	3.99685	1	0
8	141	0	0.197877	0.197877	1	0
8	142	0	1.38373	1.38373	1	0
8	143	0	-2.38415	2.38415	0	0
8	144	0	-1.78864	1.78864	0	0
8	145	0	2.06351	2.06351	1	0
8	146	0	-14.9552	14.9552	0	0
8	147	0	6.30991	6.30991	1	0
8	148	0	4.16888	4.16888	1	0
8	149	0	5.72705	5.72705	1	0
8	150	0	-1.63124	1.63124	0	0
8	151	0	11.1881	11.1881	1	0
8	152	0	0.911455	0.911455	1	0
8	153	0	-1.98228	1.98228	0	0
8	154	0	3.30302	3.30302	1	0
8	155	1	1.48701	1.48701	1	0
8	156	0	-10.2	10.2	0	0
8	157	0	1.03568	1.03568	1	0
8	158	0	-5.77742	5.77742	0	0
8	159	-1	5.11505	5.11505	1	0
8	160	0	1.40014	1.40014	1	0
8	161	0	-2.14739	2.14739	0	0
8	162	0	1.10361	1.10361	1	0
8	163	2	5.34568	5.34568	1	0
8	164	0	-10.1074	10.1074	0	0
8	165	0	4.7215	4.7215	1	0
8	166	0	-6.00909	6.00909	0	0
8	167	0	3.70958	3.70958	1	0
8	168	0	2.63013	2.63013	1	0
8	169	0	-7.80252	7.80252	0	0
8	170	0	-1.20952	1.20952	0	0
8	171	0	-0.307466	0.307466	0	0
8	172	-1	6.50755	6.50755	1	0
8	173	0	-8.06321	8.06321	0	0
8	174	0	-1.94469	1.94469	0	0
8	175	0	8.16106	8.16106	1	0
8	176	0	-4.87814	4.87814	0	0
8	177	0	0.218948	0.218948	1	0
8	178	0	-4.54917	4.54917	0	0
8	179	0	14.3527	14.3527	1	0
8	180	0	6.93747	6.93747	1	0
8	181	0	4.77445	4.77445	1	0
8	182	0	-15.1586	15.1586	0	0
8	183	0	3.58436	3.58436	1	0
8	184	1	9.68633	9.68633	1	0
8	185	0	-9.64215	9.64215	0	0
8	186	0	-5.36713	5.36713	0	0
8	187	0	-1.01712	1.01712	0	0
8	188	0	4.45529	4.45529	1	0
8	189	0	-6.84334	6.84334	0	0
8	190	0	-0.535472	0.535472	0	0
8	191	0	3.77988	3.77988	1	0
8	192	0	0.589233	0.589233	1	0
8	193	0	4.91978	4.91978	1	0
8	194	0	4.31008	4.31008	1	0
8	195	0	-1.47276	1.47276	0	0
8	196	0	2.973	2.973	1	0
8	197	0	2.74065	2.74065	1	0
8	198	0	-3.73186	3.73186	0	0
8	199	0	-1.72117	1.72117	0	0
8	200	0	-7.59562	7.59562	0	0
9	1	-99	-7.44136	7.44136	0	0
9	2	-99	-2.65276	2.65276	0	0
9	3	0	-5.44611	5.44611	0	0
9	4	6	10.3598	10.3598	1	0
9	5	-69	-5.14181	5.14181	0	0
9	6	0	10.8172	10.8172	1	0
9	7	-8	-1.12253	1.12253	0	0
9	8	-9	5.57358	5.57358	1	0
9	9	-3	-2.84365	2.84365	0	0
9	11	-4	2.77979	2.77979	1	0
9	12	-1	-6.21269	6.21269	0	0
9	13	0	0.796432	0.796432	1	0
9	14	-16	-5.51645	5.51645	0	0
9	15	-15	-2.97342	2.97342	0	0
9	16	-1	8.81271	8.81271	1	0
9	17	0	8.41063	8.41063	1	0
9	18	-1	1.22543	1.22543	1	0
9	19	2	0.567876	0.567876	1	0
9	20	1	6.96824	6.96824	1	0
9	21	0	-8.28905	8.28905	0	0
9	22	0	2.66485	2.66485	1	0
9	23	1	3.60552	3.60552	1	0
9	24	3	-8.90032	8.90032	0	0
9	25	0	3.86712	3.86712	1	0
9	26	-3	6.85354	6.85354	1	0
9	27	-3	-3.15262	3.15262	0	0
9	28	0	-2.28913	2.28913	0	0
9	29	-1	0.310495	0.310495	1	0
9	30	0	-6.66472	6.66472	0	0
9	31	-4	1.6854	1.6854	1	0
9	32	-9	1.25521	1.25521	1	0
9	33	-2	-6.12852	6.12852	0	0
9	34	-1	-2.6158	2.6158	0	0
9	35	-2	-1.10819	1.10819	0	0
9	36	-46	1.47436	1.47436	1	0
9	37	-35	-2.66853	2.66853	0	0
9	38	-99	9.58351	9.58351	1	0
9	39	-7	-7.17879	7.17879	0	0
9	40	-4	10.1202	10.1202	1	0
9	41	-7	0.626295	0.626295	1	0
9	42	0	-1.42423	1.42423	0	0
9	43	0	9.44613	9.44613	1	0
9	44	0	-9.83846	9.83846	0	0
9	45	0	1.65336	1.65336	1	0
9	46	-2	-9.94592	9.94592	0	0
9	47	-1	-4.2831	4.2831	0	0
9	48	0	-2.81043	2.81043	0	0
9	49	-1	-1.43896	1.43896	0	0
9	50	0	5.77397	5.77397	1	0
9	51	-14	2.29356	2.29356	1	0
9	52	-2	-4.31084	4.31084	0	0
9	53	-12	-6.61344	6.61344	0	0
9	54	-15	-1.43599	1.43599	0	0
9	55	-1	6.14179	6.14179	1	0
9	56	-2	6.17546	6.17546	1	0
9	57	-51	-13.4871	13.4871	0	0
9	58	-12	2.35744	2.35744	1	0
9	59	-9	11.2437	11.2437	1	0
9	60	-17	-6.70716	6.70716	0	0
9	61	-18	2.7779	2.7779	1	0
9	62	-8	0.920309	0.920309	1	0
9	63	-15	2.66956	2.66956	1	0
9	64	-38	-12.0919	12.0919	0	0
9	65	-49	2.08724	2.08724	1	0
9	66	-3	8.33777	8.33777	1	0
9	67	0	8.84444	8.84444	1	0
9	68	3	1.72922	1.72922	1	0
9	69	-2	-5.39554	5.39554	0	0
9	70	-23	3.78144	3.78144	1	0
9	71	4	5.37377	5.37377	1	0
9	72	5	2.71159	2.71159	1	0
9	73	-27	-3.17781	3.17781	0	0
9	74	-12	0.668994	0.668994	1	0
9	75	-6	-4.20181	4.20181	0	0
9	76	-35	-3.5187	3.5187	0	0
9	77	-42	-1.30263	1.30263	0	0
9	78	-44	-11.3584	11.3584	0	0
9	79	-29	5.58568	5.58568	1	0
9	80	-22	7.92464	7.92464	1	0
9	81	-13	-6.68167	6.68167	0	0
9	82	-33	-6.20602	6.20602	0	0
9	83	-19	-0.675102	0.675102	0	0
9	84	-70	-2.87745	2.87745	0	0
9	85	-37	4.7096	4.7096	1	0
9	86	-53	-3.84519	3.84519	0	0
9	87	-37	2.00765	2.00765	1	0
9	88	-28	3.34442	3.34442	1	0
9	89	-27	8.91394	8.91394	1	0
9	90	-31	2.36596	2.36596	1	0
9	91	-33	-9.87012	9.87012	0	0
9	92	-26	-0.934697	0.934697	0	0
9	93	-28	-4.01095	4.01095	0	0
9	94	-43	-0.0999314	0.0999314	0	0
9	95	-30	-3.96573	3.96573	0	0
9	96	-22	5.6089	5.6089	1	0
9	97	-48	1.77514	1.77514	1	0
9	98	-40	6.73374	6.73374	1	0
9	99	-49	9.58462	9.58462	1	0
9	100	-3	-5.82706	5.82706	0	0
9	101	-2	-2.09486	2.09486	0	0
9	102	7	-5.39167	5.39167	0	0
9	103	-13	-2.55691	2.55691	0	0
9	104	-19	-5.52486	5.52486	0	0
9	105	1	-1.03318	1.03318	0	0
9	106	4	0.7951	0.7951	1	0
9	107	6	11.8373	11.8373	1	0
9	108	-2	0.589758	0.589758	1	0
9	109	0	-9.00357	9.00357	0	0
9	110	0	7.29147	7.29147	1	0
9	111	-2	5.16711	5.16711	1	0
9	112	0	3.43448	3.43448	1	0
9	113	0	-2.73705	2.73705	0	0
9	114	0	3.91239	3.91239	1	0
9	115	-1	-7.45989	7.45989	0	0
9	116	-3	2.59853	2.59853	1	0
9	117	-1	-15.4346	15.4346	0	0
9	118	0	1.16216	1.16216	1	0
9	119	0	-2.79253	2.79253	0	0
9	120	0	2.15691	2.15691	1	0
9	121	-4	6.62227	6.62227	1	0
9	122	0	-4.37219	4.37219	0	0
9	123	-1	-1.07398	1.07398	0	0
9	124	-1	-1.25032	1.25032	0	0
9	125	0	-2.29495	2.29495	0	0
9	126	0	7.94467	7.94467	1	0
9	127	0	4.73151	4.73151	1	0
9	128	0	-2.32556	2.32556	0	0
9	129	0	1.04941	1.04941	1	0
9	130	0	1.10688	1.10688	1	0
9	131	1	-0.0597669	0.0597669	0	0
9	132	-4	-3.2248	3.2248	0	0
9	133	-1	2.35841	2.35841	1	0
9	134	0	2.62512	2.62512	1	0
9	135	0	3.50439	3.50439	1	0
9	136	0	1.32746	1.32746	1	0
9	137	0	-0.885016	0.885016	0	0
9	138	-1	-7.35267	7.35267	0	0
9	139	-1	4.27181	4.27181	1	0
9	140	0	-7.16946	7.16946	0	0
9	141	-1	-0.208147	0.208147	0	0
9	142	-1	-1.37434	1.37434	0	0
9	143	0	0.814664	0.814664	1	0
9	144	-5	3.00521	3.00521	1	0
9	145	0	-1.97802	1.97802	0	0
9	146	0	-0.145224	0.145224	0	0
9	147	0	-6.90755	6.90755	0	0
9	148	-1	12.3547	12.3547	1	0
9	149	-3	-6.47372	6.47372	0	0
9	150	0	-5.67669	5.67669	0	0
9	151	1	-3.92152	3.92152	0	0
9	152	-3	-2.66408	2.66408	0	0
9	153	0	4.61001	4.61001	1	0
9	154	-1	3.87533	3.87533	1	0
9	155	-1	5.00958	5.00958	1	0
9	156	0	6.73902	6.73902	1	0
9	157	-1	-3.56955	3.56955	0	0
9	158	0	-1.04839	1.04839	0	0
9	159	0	-1.08101	1.08101	0	0
9	160	0	1.74369	1.74369	1	0
9	161	-3	-10.2423	10.2423	0	0
9	162	0	-0.649123	0.649123	0	0
9	163	-3	-3.93339	3.93339	0	0
9	164	0	2.39676	2.39676	1	0
9	165	-1	-3.95845	3.95845	0	0
9	166	-2	-9.11601	9.11601	0	0
9	167	-1	3.55173	3.55173	1	0
9	168	-1	7.0121	7.0121	1	0
9	169	-1	-1.83296	1.83296	0	0
9	170	0	-3.55376	3.55376	0	0
9	171	-1	-3.45713	3.45713	0	0
9	172	1	-0.591849	0.591849	0	0
9	173	-3	6.46235	6.46235	1	0
9	174	1	-1.72638	1.72638	0	0
9	175	0	12.4584	12.4584	1	0
9	176	0	-5.06112	5.06112	0	0
9	177	0	-3.87594	3.87594	0	0
9	178	0	2.11691	2.11691	1	0
9	179	1	14.7829	14.7829	1	0
9	180	-1	3.77994	3.77994	1	0
9	181	-1	-8.41596	8.41596	0	0
9	182	0	-2.42227	2.42227	0	0
9	183	-4	2.9415	2.9415	1	0
9	184	-1	-14.0174	14.0174	0	0
9	185	-1	2.82459	2.82459	1	0
9	186	2	-2.39609	2.39609	0	0
9	187	0	-5.00282	5.00282	0	0
9	188	0	1.46917	1.46917	1	0
9	189	0	10.904	10.904	1	0
9	190	0	-3.84242	3.84242	0	0
9	191	-2	-2.62756	2.62756	0	0
9	192	-3	-2.04451	2.04451	0	0
9	193	0	-5.71638	5.71638	0	0
9	194	-2	5.16063	5.16063	1	0
9	195	4	-2.68391	2.68391	0	0
9	196	4	-5.31589	5.31589	0	0
9	197	-2	3.04105	3.04105	1	0
9	198	2	-0.382458	0.382458	0	0
9	199	0	2.65141	2.65141	1	0
9	200	8	-0.228787	0.228787	0	0
10	2	0	-4.10404	4.10404	0	0
10	3	1	11.5891	11.5891	1	0
10	4	19	3.46288	3.46288	1	0
10	5	0	-12.2639	12.2639	0	0
10	7	0	16.0999	16.0999	1	0
10	8	7	-8.21263	8.21263	0	0
10	9	0	-1.56298	1.56298	0	0
10	10	1	-1.88463	1.88463	0	0
10	11	0	7.70508	7.70508	1	0
10	12	0	-4.3421	4.3421	0	0
10	13	0	8.74563	8.74563	1	0
10	14	0	2.81528	2.81528	1	0
10	15	0	-2.50468	2.50468	0	0
10	16	28	-0.365094	0.365094	0	0
10	17	0	0.663678	0.663678	1	0
10	18	0	1.46212	1.46212	1	0
10	19	0	-8.97878	8.97878	0	0
10	20	0	4.9111	4.9111	1	0
10	21	0	3.06007	3.06007	1	0
10	22	0	0.630768	0.630768	1	0
10	23	0	-10.1883	10.1883	0	0
10	24	1	0.580237	0.580237	1	0
10	25	0	-4.47728	4.47728	0	0
10	26	0	0.460052	0.460052	1	0
10	27	0	-10.312	10.312	0	0
10	28	0	-4.76684	4.76684	0	0
10	29	0	3.79131	3.79131	1	0
10	30	0	5.21912	5.21912	1	0
10	32	0	-0.769959	0.769959	0	0
10	33	0	5.7428	5.7428	1	0
10	34	0	-5.1215	5.1215	0	0
10	35	0	-9.2301	9.2301	0	0
10	36	0	6.35731	6.35731	1	0
10	37	1	-0.156006	0.156006	0	0
10	38	0	-6.14234	6.14234	0	0
10	39	0	6.15188	6.15188	1	0
10	41	0	2.55072	2.55072	1	0
10	43	1	9.45788	9.45788	1	0
10	44	0	-5.00355	5.00355	0	0
10	45	0	-1.43255	1.43255	0	0
10	46	0	-1.43408	1.43408	0	0
10	48	0	3.44761	3.44761	1	0
10	49	0	0.0196777	0.0196777	1	0
10	50	38	-6.69964	6.69964	0	0
10	51	0	0.796733	0.796733	1	0
10	52	0	9.02338	9.02338	1	0
10	53	1	-2.45084	2.45084	0	0
10	55	0	2.1669	2.1669	1	0
10	56	0	-1.28795	1.28795	0	0
10	57	0	0.707041	0.707041	1	0
10	58	0	2.40963	2.40963	1	0
10	59	0	0.802822	0.802822	1	0
10	60	1	-6.15391	6.15391	0	0
10	61	0	-1.87574	1.87574	0	0
10	62	1	-3.51582	3.51582	0	0
10	63	0	9.57541	9.57541	1	0
10	64	1	5.24893	5.24893	1	0
10	65	0	-5.72778	5.72778	0	0
10	67	0	2.97752	2.97752	1	0
10	68	0	-2.29898	2.29898	0	0
10	69	0	-10.8032	10.8032	0	0
10	70	0	-6.3582	6.3582	0	0
10	71	0	-0.689036	0.689036	0	0
10	72	0	3.3143	3.3143	1	0
10	73	0	8.19106	8.19106	1	0
10	74	0	3.61298	3.61298	1	0
10	75	1	7.04399	7.04399	1	0
10	76	0	0.854325	0.854325	1	0
10	77	-6	0.473558	0.473558	1	0
10	78	0	-9.45242	9.45242	0	0
10	79	0	3.5603	3.5603	1	0
10	80	0	-0.150649	0.150649	0	0
10	81	0	-0.255062	0.255062	0	0
10	82	0	2.45849	2.45849	1	0
10	83	0	-1.86356	1.86356	0	0
10	84	0	9.41111	9.41111	1	0
10	85	0	-6.68711	6.68711	0	0
10	86	0	-3.00875	3.00875	0	0
10	87	0	3.17732	3.17732	1	0
10	88	0	-3.12858	3.12858	0	0
10	89	0	-4.02435	4.02435	0	0
10	90	0	-3.06751	3.06751	0	0
10	91	0	14.0184	14.0184	1	0
10	92	0	-4.34369	4.34369	0	0
10	93	0	2.15928	2.15928	1	0
10	94	0	-6.0455	6.0455	0	0
10	96	0	1.56752	1.56752	1	0
10	97	0	0.662268	0.662268	1	0
10	98	1	2.1422	2.1422	1	0
10	99	0	-0.493996	0.493996	0	0
10	100	40	-2.95894	2.95894	0	0
10	101	0	-5.81787	5.81787	0	0
10	102	0	-5.68241	5.68241	0	0
10	103	0	1.7553	1.7553	1	0
10	104	0	10.0174	10.0174	1	0
10	105	0	-4.66441	4.66441	0	0
10	106	0	10.1215	10.1215	1	0
10	107	0	3.5677	3.5677	1	0
10	108	0	-5.89509	5.89509	0	0
10	109	0	0.309553	0.309553	1	0
10	110	0	-0.689694	0.689694	0	0
10	111	0	3.4366	3.4366	1	0
10	112	0	0.199008	0.199008	1	0
10	113	0	0.55518	0.55518	1	0
10	114	0	1.00589	1.00589	1	0
10	115	0	8.76888	8.76888	1	0
10	116	0	-3.85992	3.85992	0	0
10	117	0	1.3871	1.3871	1	0
10	118	0	-0.855716	0.855716	0	0
10	119	0	-9.40395	9.40395	0	0
10	120	0	1.48268	1.48268	1	0
10	121	0	-5.13085	5.13085	0	0
10	122	0	-5.04026	5.04026	0	0
10	123	0	5.43705	5.43705	1	0
10	124	0	5.19993	5.19993	1	0
10	125	0	-1.41469	1.41469	0	0
10	126	0	1.8044	1.8044	1	0
10	127	0	-1.5733	1.5733	0	0
10	128	0	3.95065	3.95065	1	0
10	129	0	0.440211	0.440211	1	0
10	130	0	6.20585	6.20585	1	0
10	131	0	-3.24991	3.24991	0	0
10	132	0	-6.21027	6.21027	0	0
10	134	0	7.01842	7.01842	1	0
10	135	0	-0.869182	0.869182	0	0
10	136	0	-7.24262	7.24262	0	0
10	137	0	4.14242	4.14242	1	0
10	138	0	4.01167	4.01167	1	0
10	139	0	-10.8448	10.8448	0	0
10	140	0	8.81788	8.81788	1	0
10	141	0	-8.09804	8.09804	0	0
10	142	0	-4.06541	4.06541	0	0
10	143	1	-3.9221	3.9221	0	0
10	144	3	10.8102	10.8102	1	0
10	145	1	-17.3233	17.3233	0	0
10	146	1	10.4622	10.4622	1	0
10	147	0	0.711538	0.711538	1	0
10	148	1	-5.05306	5.05306	0	0
10	149	0	-2.27434	2.27434	0	0
10	151	0	6.43285	6.43285	1	0
10	152	0	-0.287236	0.287236	0	0
10	153	0	2.68506	2.68506	1	0
10	154	0	7.79967	7.79967	1	0
10	155	0	-3.85378	3.85378	0	0
10	156	0	-0.350796	0.350796	0	0
10	157	0	-9.26687	9.26687	0	0
10	158	0	0.757084	0.757084	1	0
10	159	0	2.77066	2.77066	1	0
10	160	0	-0.839202	0.839202	0	0
10	161	0	-1.30217	1.30217	0	0
10	162	0	-5.43777	5.43777	0	0
10	163	0	2.42216	2.42216	1	0
10	164	0	-1.05456	1.05456	0	0
10	165	0	2.41696	2.41696	1	0
10	166	0	-3.60547	3.60547	0	0
10	167	0	1.91296	1.91296	1	0
10	168	0	-0.591493	0.591493	0	0
10	169	0	-3.10031	3.10031	0	0
10	170	1	-3.66132	3.66132	0	0
10	171	0	-4.69593	4.69593	0	0
10	172	0	-0.501773	0.501773	0	0
10	173	0	1.68834	1.68834	1	0
10	174	0	-0.732423	0.732423	0	0
10	175	1	-0.167695	0.167695	0	0
10	176	0	14.2223	14.2223	1	0
10	177	0	-0.127487	0.127487	0	0
10	178	0	-1.13792	1.13792	0	0
10	179	0	-8.78132	8.78132	0	0
10	180	0	-1.48882	1.48882	0	0
10	181	0	-5.56691	5.56691	0	0
10	182	0	-4.02121	4.02121	0	0
10	183	1	1.56057	1.56057	1	0
10	184	0	-0.0890948	0.0890948	0	0
10	185	0	-1.07089	1.07089	0	0
10	186	0	6.57355	6.57355	1	0
10	187	0	10.6954	10.6954	1	0
10	188	0	10.1071	10.1071	1	0
10	189	0	7.32995	7.32995	1	0
10	190	0	-5.35906	5.35906	0	0
10	191	1	1.48002	1.48002	1	0
10	192	0	3.02842	3.02842	1	0
10	193	0	-4.4918	4.4918	0	0
10	194	0	-7.9148	7.9148	0	0
10	195	1	-2.18363	2.18363	0	0
10	196	0	-5.66411	5.66411	0	0
10	197	0	1.87582	1.87582	1	0
10	198	0	-0.551161	0.551161	0	0
10	199	1	10.4496	10.4496	1	0
10	200	0	1.66408	1.66408	1	0
11	9	0	1.63597	1.63597	1	0
11	26	0	-1.8213	1.8213	0	0
11	40	0	-8.96476	8.96476	0	0
11	41	0	14.0045	14.0045	1	0
11	42	0	-6.73712	6.73712	0	0
11	43	0	-6.42521	6.42521	0	0
11	44	0	-6.06148	6.06148	0	0
11	45	0	6.46	6.46	1	0
11	46	0	7.1762	7.1762	1	0
11	47	0	-0.983055	0.983055	0	0
11	48	0	-4.98777	4.98777	0	0
11	49	0	-0.934239	0.934239	0	0
11	50	0	-9.29324	9.29324	0	0
11	51	0	3.04131	3.04131	1	0
11	52	0	-11.9342	11.9342	0	0
11	53	0	-0.445357	0.445357	0	0
11	54	0	-0.834107	0.834107	0	0
11	55	0	8.09358	8.09358	1	0
11	56	0	-5.09575	5.09575	0	0
11	57	0	2.75902	2.75902	1	0
11	58	0	3.12675	3.12675	1	0
11	59	0	-1.30381	1.30381	0	0
11	60	0	7.84121	7.84121	1	0
[truncated: 42,814 more rows]
